# Supplementary material for: Bioinspired HOF-based luminescent skin sensor with triple mechanochromism responses for the recognition and collection of human biophysical signals
Source: Royal Society of Chemistry journal article supplement (doi:10.1039/d3mh00096f), 2023-01-01

# Bioinspired HOF-based luminescent skin sensor with triple mechanochromism responses for recognition and collection of human biophysical signals

Xin Xu,<sup>a</sup> and Bing Yan<sup>\*,a</sup>

<sup>a</sup> Shanghai Key Lab of Chemical Assessment and Sustainability, School of Chemical Science and Engineering, Tongji University, Siping Road 1239, Shanghai 200092, China. E-mail: byan@tongji.edu.cn.

## Electronic supplementary information

### Experimental Section

1. Materials
2. Physical Measurements
3. Preparation of HOF-TJ-1
4. Preparation of elastic porous HOF-TJ-1@PDMS film
5. Preparation of RhB@HOF-TJ-1 (R), AY@HOF-TJ-1 (G) and AY/RhB@HOF-TJ-1 (Y)
6. Preparation of elastic HOF-TJ-1/R@PDMS bilayer film (1)
7. Preparation of elastic HOF-TJ-1/Y@PDMS bilayer film (2)
8. Preparation of elastic HOF-TJ-1/G@PDMS bilayer film (3)
9. Preparation of elastic HOF-TJ-1@PDMS bilayer film (4)
10. The Anti-interference Measurement of Porous HOF-TJ-1@PDMS Film toward Volatile Organic Compounds and Artificial Sweat
11. Single-Crystal X-ray Diffraction Determination
12. Density Functional Theory (DFT) Calculation
13. Mechanical Simulation
14. Skin Sensor Array Model Simulation

**Fig. S1.** (a) Single molecule structure of **HOF-TJ-1**. (b) The angle between plane 1 (blue) and plane 2 (yellow) is 59.917°, the angle between plane 1 (blue) and plane 3 (green) is 55.213°, the angle between plane 2 (yellow) and plane 3 (green) is 68.908°. Plane 1: C8–C13 atoms; Plane 2: C1–C6 atoms; Plane 3: C14–C19 atoms.

**Fig. S2.** (a) Two BPA<sup>-</sup> anions connected by two H<sub>2</sub>O molecules *via* hydrogen bond interaction along *bc* plane. (b) Adjacent BPA<sup>-</sup> anions linked by hydrogen bond forms a 1-D chain along *ac* plane. (c) Adjacent 1-D chain of BPA<sup>-</sup> anions connect with each other to form a 2-D BPA<sup>-</sup> layer based on hydrogen bond interaction along *ab* plane. (d–e) The polyline-type structure of separate BPA<sup>-</sup> anion layer and TBA<sup>+</sup> cation layer viewed along *a* axis. (f) The micropore structure with ca. 5.6 Å diameter between BPA<sup>-</sup> anion and TBA<sup>+</sup> cation viewed along *a* axis.

**Fig. S3.** (a) PXRD patterns of **HOF-TJ-1** indicating chemical stability of **HOF-TJ-1** immersed in H<sub>2</sub>O, acetone, trichloromethane, tetrahydrofuran, alkaline (pH = 14) and acidic aqueous (pH = 1) solutions. (b) TG curve of **HOF-TJ-1**. (c) PXRD patterns of **HOF-TJ-1**, **R**, **Y** and **G**. (d) IR spectra of **HOF-TJ-1**, **R**, **Y** and **G**.

**Fig. S4.** (a–d) Photoluminescence quantum yield of **HOF-TJ-1** (60.43%), **R** (62.00%), **Y** (47.28%) and **G** (34.20%).

**Fig. S5.** (a) Fluorescence lifetime ( $\lambda_{em} = 470$  nm) of **HOF-TJ-1**. (b) Excitation spectrum of **HOF-TJ-1** ( $\lambda_{em} = 470$  nm). (c) LUMO (-1.757 eV) and HOMO (-5.820 eV) orbit distribution of **HOF-TJ-1**. (d) CIE coordinates of **HOF-TJ-1** (0.1692, 0.1353), **R** (0.5021, 0.2694), **Y** (0.347, 0.5033) and **G** (0.2246, 0.5075).

**Fig. S6.** Schematic image of energy transfer from  $S_1^{HOF}$  to  $S_1^{Dye}$  state.

**Fig. S7.** The side view of **1** with bilayer structure under 365 nm UV light, the thickness of top and bottom layers are respectively 2.0 and 1.0 mm.

**Fig. S8.** EDX spectrum of HOF-TJ-1@PDMS film demonstrating the element content of C (54.12%), Si (12.39%), O (32.84%) and N (0.65%).

**Fig. S9.** (a) The uniaxial stretching strain curves of **1–4**. (b) Uniaxial stretching strain cycle of four times of **1**.

**Fig. S10.** (a) SEM picture of porous HOF-TJ-1@PDMS film ( $V_{PDMS}/V_{H_2O}/V_{ethanol} = 2/1/1$ ). (b) SEM picture of porous HOF-TJ-1@PDMS film ( $V_{PDMS}/V_{H_2O}/V_{ethanol} = 1/0/0$ ).

**Fig. S11.** The luminescence chemical stability of porous HOF-TJ-1@PDMS film (a–b), R@PDMS film (c–d), G@PDMS film (e–f) and Y@PDMS film (g–h) after exposing in 12 volatile organic compounds such as ammonia, hydrochloric acid, methanol, acetic acid, amine, chloroform, formamide, nitrobenzene, formaldehyde, benzaldehyde, methylamine and diethylamine for 10 min, and immersing in artificial sweat for 10 min. The thermal stability of porous HOF-TJ-1@PDMS film (i–j), R@PDMS film (k–l), G@PDMS film (m–n) and Y@PDMS film (o–p) in 30–80 °C temperature range.

**Fig. S12.** (a) Emission spectra of **1** upon different stretching strains (0–100% strain,  $\lambda_{ex} = 365$  nm). (b) Dependence of emission intensity of 470 and 586 nm peaks on stretching strain of **1**. (c) Calibration curve of  $I/I_0$  at 586 nm toward  $\log_{10}(\epsilon)$  upon 0–100% strain for **1**. ( $\lambda_{ex} = 365$  nm). (d) Dependence of ratio of  $I_{470}/I_{586}$  on stretching strain of **1**. (e) Calibration curve of  $\log_{10}(I_{470}/I_{586})$  toward stretching strain upon 0–100% strain for **1**. ( $\lambda_{ex} = 365$  nm). (f) CIE coordinates of **1** upon different stretching strains.

**Fig. S13.** (a) Emission spectra of **2** upon different stretching strains (0–100% strain,  $\lambda_{ex} = 365$  nm). (b) Dependence of emission intensity of 470 and 586 nm peaks on stretching strain of **2**. (c) Dependence of ratio of  $I_{470}/I_{586}$  on stretching strain of **2**. (d) Luminescence pictures of **2** upon different stretching strains (0–100% strain,  $\lambda_{ex} = 365$  nm). (e) CIE coordinates of **2** upon different stretching strains. (f) The stretching cycle experiment of **2**. (g) Calibration curve of  $I/I_0$  at 586 nm toward stretching strain upon 0–100% strain for **2**. ( $\lambda_{ex} = 365$  nm). (h) Calibration curve of  $I/I_0$  at 586 nm toward stretching strain upon 0–100% strain for **2**. ( $\lambda_{ex} = 365$  nm).

**Fig. S14.** (a) Emission spectra of **3** upon different stretching strains (0–100% strain,  $\lambda_{ex} = 365$  nm). (b) Dependence of emission intensity of 470 and 517 nm peaks on stretching strain of **3**. (c) Dependence of ratio of  $I_{470}/I_{517}$  on stretching strain of **3**. (d) Luminescence pictures of **3** upon different stretching strains (0–100% strain,  $\lambda_{ex} = 365$  nm). (e) CIE coordinates of **3** upon different stretching strains. (f) The stretching cycle experiment of **3**. (g) Calibration curve of  $I/I_0$  at 470 nm toward stretching strain upon 0–100% strain for **3** ( $\lambda_{ex} = 365$  nm). (h) Calibration curve of  $I/I_0$  at 517 nm toward stretching strain upon 0–100% strain for **3** ( $\lambda_{ex} = 365$  nm).

**Fig. S15.** (a) Emission spectra of **4** upon different stretching strains (0–100% strain,  $\lambda_{ex} = 365$  nm). (b) Luminescence pictures of **4** upon different stretching strains (0–100% strain,  $\lambda_{ex} = 365$  nm). (c) Calibration curve of  $I/I_0$  at 470 nm toward stretching strain upon 0–100% strain for **4** ( $\lambda_{ex} = 365$  nm). (d) The stretching cycle experiment of **4**.

**Fig. S16.** Microscope pictures of porous HOF-TJ-1@PDMS layer upon 0% (a) and 50% (b) stretching strains.

**Fig. S17.** Dependence of  $I/I_0$  on stretching strain of R@PDMS film (0–100% strain).

**Fig. S18.** FES 2-D mechanics stretching model of side view upon 0, 10, 20, 30, 40, 60, 70, 80, 90 and 100% strain for **1**.

**Fig. S19.** (a) Transmittance spectra of porous HOF-TJ-1@PDMS film and porous PDMS film. (b) The variation of thickness and transparency for the porous HOF-TJ-1@PDMS (top) layer.

**Fig. S20.** (a) Emission spectra of **1** with 0–180° bending angle ( $\lambda_{\text{ex}} = 365$  nm). (b) Dependence of emission intensity of 470 and 586 nm peaks on bending strain of **1**. (c) Calibration curve of  $I/I_0$  at 586 nm toward  $\log_{10}(\theta)$  with 0–180° bending angle for **1**. ( $\lambda_{\text{ex}} = 365$  nm). (d) Dependence of ratio of  $I_{470}/I_{586}$  on bending strain of **1**. (e) Calibration curve of  $\log_{10}(I_{470}/I_{586})$  toward bending strain with 0–180° bending angle for **1**. ( $\lambda_{\text{ex}} = 365$  nm). (f) CIE coordinates of **1** upon different bending strains.

**Fig. S21.** (a) Emission spectra of **2** with 0–180° bending angle ( $\lambda_{\text{ex}} = 365$  nm). (b) Dependence of emission intensity of 470 and 586 nm peaks on bending strain of **2**. (c) Dependence of ratio of  $I_{470}/I_{586}$  on bending strain of **2**. (d) CIE coordinates of **2** upon different bending strains. (e) Luminescence pictures of **2** with 0–180° bending angle ( $\lambda_{\text{ex}} = 365$  nm). (f) The bending cycle experiment of **2**. (g) Calibration curve of  $I/I_0$  at 586 nm toward  $\log_{10}(\theta)$  with 0–180° bending angle ( $\lambda_{\text{ex}} = 365$  nm) for **2**. (h) Calibration curve of  $I/I_0$  at 586 nm toward bending strain with 0–180° bending angle ( $\lambda_{\text{ex}} = 365$  nm) for **2**. ( $\lambda_{\text{ex}} = 365$  nm).

**Fig. S22.** (a) Emission spectra of **3** with 0–180° bending angle ( $\lambda_{\text{ex}} = 365$  nm). (b) Dependence of emission intensity of 470 and 517 nm peaks on bending strain of **3**. (c) Dependence of ratio of  $I_{470}/I_{517}$  on bending strain of **3**. (d) CIE coordinates of **3** upon different bending strains. (e) Luminescence pictures of **3** with 0–180° bending angle ( $\lambda_{\text{ex}} = 365$  nm). (f) The bending cycle experiment of **3**. (g) Calibration curve of  $I/I_0$  at 470 nm toward  $\log_{10}(\theta)$  with 0–180° bending angle ( $\lambda_{\text{ex}} = 365$  nm). (h) Calibration curve of  $I/I_0$  at 517 nm toward bending strain with 0–180° bending angle ( $\lambda_{\text{ex}} = 365$  nm).

**Fig. S23.** (a) Emission spectra of **4** with 0–180° bending angle ( $\lambda_{\text{ex}} = 365$  nm). (b) Calibration curve of  $I/I_0$  at 470 nm toward bending strain with 0–180° bending angle ( $\lambda_{\text{ex}} = 365$  nm) for **4** ( $\lambda_{\text{ex}} = 365$  nm). (c) Luminescence pictures of **4** with 0–180° bending angle ( $\lambda_{\text{ex}} = 365$  nm). (d) The bending cycle experiment of **4**.

**Fig. S24.** Microscope pictures of porous HOF-TJ-1@PDMS layer with 0° (a) and 60° (b) bending angles.

**Fig. S25.** FES 2-D mechanics bending model of side view with 0°, 30°, 60° and 90° angles for **1**.

**Fig. S26.** Calibration curve of  $(I - I_0)/I_0$  at 470 nm toward pressing strain under 0–40% press strain.

**Fig. S27.** The pressing cycle experiment of **1**.

**Fig. S28.** (a) Kinetic curves of 470 and 586 nm peaks demonstrating the change of emission intensity upon 0, 10, 20, 30, and 40% press strains for **2**. (b) Calibration curve of  $I/I_0$  at 586 nm toward pressing strain under 0–40% press strain for **2**. ( $\lambda_{\text{ex}} = 310$  nm). (c) Luminescence pictures of initial **2** and **2** pressed by a glass tube ( $\lambda_{\text{ex}} = 310$  nm). (d) Kinetic curves of 470 nm peak demonstrating the change of emission intensity upon 0, 10, 20, 30, and 40% press strains for **3**. (e) Calibration curve of  $I/I_0$  of 470 nm peak toward pressing strain upon 0–40% strain for **3** ( $\lambda_{\text{ex}} = 310$  nm). (f) Luminescence pictures of initial **3** and **3** pressed by a glass tube ( $\lambda_{\text{ex}} = 310$  nm). (g) Kinetic curves of 470 nm peak demonstrating the change of emission intensity upon 0, 10, 20, 30, and 40% press strains for **4**. (h) Calibration curve of  $I/I_0$  of 470 nm peak toward pressing strain upon 0–40% strain for **4** ( $\lambda_{\text{ex}} = 310$  nm). (i) Luminescence pictures of initial **4** and **4** pressed by a glass tube ( $\lambda_{\text{ex}} = 310$  nm).

**Fig. S29.** FES 2-D mechanics pressing model of side view under 10% (a) and 20% (b) pressing strain for **1**.

**Fig. S30.** (a) Kinetic curves of 586 nm peaks demonstrating the change of emission intensity with 0°, 30°, 60°, 90° bending angles for finger bending motion luminescence sensing. (b) Dependence of  $(I - I_0)/I_0$  of 586 nm peaks on bending angle with 0–90°. (c) Kinetic curves of 586 nm peaks

demonstrating the change of emission intensity with 90° bending angle for fast and slow finger bending motion. (d) Luminescence pictures of **1** stuck on a finger with 0°, 30°, 60°, 90° bending angles, and relative R.G.B. values at bending center of **1** for finger bending motion chroma sensing. (e) Dependence of R.G.B. values of **1** on bending angle with 0–90°. (f) Dependence of R/B value of **1** on bending angle with 0–90° for finger bending motion chroma sensing.

**Fig. S31.** PCNN model constructed based on PMC property of **1** for enhancing tactile signal. Following five equations (1–5) are used for signal enhancing.

**Fig. S32.** (a) Schematic image demonstrating the 60 × 60 array based on **1** as mechanoreceptor for collecting initial palm texture, and PCNN model using to enhancing palm texture signal. (b) 3-D palm texture model obtained by 60 × 60 array based on **1**. (c) Initial 2-D palm texture gray image transformed by 3-D palm texture model. (d) Enhanced 3-D palm texture model obtained by 60 × 60 array based on **1**. (e) Enhanced 2-D palm texture gray image transformed by 3-D palm texture model.

**Fig. S33.** Training curve of BPNN1 model, the ordinate value decreases to 0, suggesting the successful fitting of BPNN1 model.

**Fig. S34.** Training curve of BPNN2 model, the ordinate value decreases to 0, suggesting the successful fitting of BPNN2 model.

**Table S1.** An overall comparison of this work and other works about luminescent mechanochromism polymer materials. (“Yes” outside the black circle means that this result is existent; “No” inside the black circle means that this result is non-existent; SMC: Stretched mechanochromism; BMC: Bended mechanochromism; PMC: Pressed mechanochromism)

**Table S2.** The crystallographic data of **HOF-TJ-1**.

**Table S3.** Summary of fluorescence decay lifetime of **1**.

**Table S4.** Element contents of C, Si, O, and N in porous **HOF-TJ-1@PDMS** film.

**Table S5.** CIE coordinates of **1**, **2** and **3** with different stretched strains of 0, 20, 40, 60, 80 and 100% ( $\lambda_{ex} = 365$  nm).

**Table S6.** Detection limits of **1–4** in stretching, bending and pressing process.

**Table S7.** CIE coordinates of **1**, **2** and **3** with different bending angles of 0, 30, 60, 90, 120, 150 and 180° ( $\lambda_{ex} = 365$  nm).

**Table S8.** CIE coordinates of **1** with different press strains of 0, 10, 20, 30 and 40%.

**Table S9.** Summary of input and output information during the training of BPNN1 for classifying bending angle ( $\theta_1$ ).

**Table S10.** Network structure information of BPNN1.

**Table S11.** The summary of mean square error (MSE), original value (OV), calculated value (CV), variance (Var.) for BPNN1.

**Table S12.** The matlab code of this BPNN 1.

**Table S13.** Summary of input and output information during the training of BPNN2.

**Table S14.** Network structure information of BPNN2.

**Table S15.** The summary of mean square error (MSE), original value (OV), calculated value (CV), variance (Var.) of BPNN2.

**Table S16.** The matlab code of this BPNN2.

**Table S17.** Summary data of the initial 3-D fingerprint texture image before tactile enhancement.

**Table S18.** Summary data of the initial 2-D fingerprint texture gray image before tactile enhancement.

**Table S19.** Summary data of the 3-D fingerprint texture image after tactile enhancement.

**Table S20.** Summary data of the 2-D fingerprint texture gray image after tactile enhancement.

**Table S21.** Summary data of the 3-D palm texture image before tactile enhancement.

**Table S22.** Summary data of the initial 2-D palm texture gray image before tactile enhancement.

**Table S23.** Summary data of the 3-D palm texture image after tactile enhancement.

**Table S24.** Summary data of the 3-D palm texture gray image after tactile enhancement.

**Movie 1.** Triple mechanochromism responses.

**Movie 2.** Finite element simulation.

## Experimental Section

### 1. Materials

4,5-bis(4-carboxyphenyl)phthalic acid (BPA), tetrabutyl ammonium chloride (TBAC), polydimethylsiloxane (PDMS), Rhodamine B (RhB) and acridine yellow (AY) were all purchased from Sigma-Aldrich and used without further purification.

### 2. Physical Measurements

Powder X-ray diffraction (PXRD) patterns were collected with a Bruker D8 ADVANCE diffractometer using Cu  $K\alpha$  radiation at 40 mA and 40 kV. SEM was performed on a Hitachi S-4800 field emission scanning electron microscope operating at 3 kV. TG curve was collected on a Bruker Tensor-II TGA 55 under the N<sub>2</sub> atmosphere with a heating rate of 10°C from 30 to 800°C. Energy dispersive X-ray spectroscopy (EDX) and the EDX mapping image were obtained by the scanning electron microscope operating at 15 kV. Fourier transform infrared (FT-IR) spectrum were recorded using a Nicolet IS10 infrared spectrophotometer. The photoluminescence (PL) emission, excitation spectra, PL quantum yield, and kinetics scan curve were recorded on an Edinburgh FLS920 spectrophotometer with a 450 W xenon lamp as an excitation source. Fluorescence lifetime measurement was measured on the Edinburgh FLS920 spectrophotometer with a laser.

In the measurement process of stretched-MC, **1** was clamped with two tweezers, a tweezer was fixed on a side of the sample platform, the other tweezer was connected with a nylon bandage. The nylon bandage was fixed on the other side of the sample platform, and the length of nylon bandage can be regulated to regulate the stretched strain (0-100%) of **1**. There is a length scale on sample platform. The sample platform was self-made. The sample platform was putted into the sample storehouse of Edinburgh FLS920 spectrophotometer for collecting PL emission spectra.

In the measurement process bended-MC, **1** was clamped with two tweezers, a tweezer was fixed on a side of the sample platform, the other tweezer was connected with a nylon bandage. A wire as center rotation axis was inserted at the bend center of **1** on the sample platform. The nylon bandage can rotate a certain angle (0-180°) to regulate the bend angle of **1**, and a pattern of protractor was drawn on the sample platform for determining the rotate angle. The sample platform was self-made. The sample platform was putted into the sample storehouse of Edinburgh FLS920 spectrophotometer for collecting PL emission spectra.

In the measurement process of pressed-MC, **1** was sandwiched by two glass slides, the distance of two glass slides can be regulated by using two elastic bands to bind two sides of the two glass slides. The two glass slides with **1** were putted into the sample storehouse of Edinburgh FLS920 spectrophotometer for collecting PL emission spectra. For kinetics curves measurement, **1** was sandwiched by two glass slides, two small elastic sponges were also sandwiched on two sides of the two glass slides. The two glass slides were bound by scotch tape on two sides. The distance of two glass slides can be regulated by using a glass tube to press the glass slides, two small elastic sponges can promote the recovery of distance between two glass slides. The point light is need to be aimed at the center of **1**. The incandescent lamp in room should be turned off.

For measuring the finger bend, **1** was stuck on the finger joint, then put the finger into the UV light source (point light, 50 W xenon lamp) of Edinburgh FLS920 spectrophotometer. The incandescent lamp in room should be turned off. Under the UV light source (point light, 50 W xenon lamp) of Edinburgh FLS920 spectrophotometer, the PL emission intensity of 586 nm peak

was measured by using kinetic curve measurement to monitor the finger bend, the point light is need to be aimed at the center of **1** on finger, and hand is need to remain stable.

### 3. Preparation of HOF-TJ-1

4,5-bis(4-carboxyphenyl)phthalic acid (BPA, 0.406 g, 0.001 mol) and tetrabutyl ammonium chloride (TBAC, 0.278 g, 0.001 mol) were mixed into a 20 mL methanol/H<sub>2</sub>O (volume ratio = 1 : 19) solution to form a mixture, which was treated with ultrasound for 15 min. After the mixture was evaporated for about 24 h at room temperature, colourless and plate-like crystal can be acquired. Yield: 0.577 g, *ca.* 84.3%. Elemental analysis (%) calcd: C, 68.55; O, 21.63; N, 2.10. Found: C, 69.23; O, 22.15; N, 1.36.

### 4. Preparation of elastic porous HOF-TJ-1@PDMS film

0.002 g HOF-TJ-1 was evenly dispersed in 1.00 ml of water/ethanol (1 : 1) mixed solution, which was then mixed with 1.1 ml PDMS solution (PDMS : curing agent = 10 : 1) to form a HOF-TJ-1@PDMS mixture. The HOF-TJ-1@PDMS mixture was put into a 25 mL beaker, which was exposed in atmospheric environment for 12 h. Afterwards, the HOF-TJ-1@PDMS mixture in beaker was heated in a 70 °C oven for 1 h. After taking out and cooling the beaker, the elastic porous HOF-TJ-1@PDMS film (thickness: *ca.* 2 mm) can be separated from the beaker.

### 5. Preparation of RhB@HOF-TJ-1 (R), AY@HOF-TJ-1 (G) and AY/RhB@HOF-TJ-1 (Y)

0.100 g HOF-TJ-1 was mixed in 20 mL RhB aqueous solution (C = 0.0001 mol/L) to form a mixture, which was stirred for 10 h. Then pink RhB@HOF-TJ-1 (R) solid can be separated through centrifugation, filtration and drying.

The preparation of AY@HOF-TJ-1 (G) with green emission light is similarly with that of R, except that the 20 mL RhB aqueous solution (C = 0.0001 mol/L) is replaced by 20 mL acridine yellow aqueous solution (C = 0.0001 mol/L).

The preparation of AY/RhB@HOF-TJ-1 (Y) with yellow emission light is similarly with that of R, except that the 20 mL RhB aqueous solution (C = 0.0001 mol/L) is replaced by 20 mL RhB/acridine yellow aqueous solution (C = 0.0001 mol/L,  $n_{\text{RhB}}/n_{\text{acridine yellow}} = 2 : 3$ ).

### 6. Preparation of elastic HOF-TJ-1/R@PDMS bilayer film (1)

0.01 g R powder was mixed evenly with 0.55 ml PDMS solution (PDMS : curing agent = 10 : 1) to form a R@PDMS mixture, which was poured into a rectangular plastic mold (1.0 × 2.0 cm<sup>2</sup>). The beaker was heated at 80 °C for 20 min, which resulted in a R@PDMS film. Afterwards, the HOF-TJ-1@PDMS mixture was coated on the upper surface of R@PDMS film evenly in the mold, which was exposed in atmospheric environment for 12 h. The mold was heated in a 70 °C oven for 30 min. After taking out and cooling the film, the elastic HOF-TJ-1/R@PDMS bilayer film (**1**) can be acquired.

### 7. Preparation of elastic HOF-TJ-1/Y@PDMS bilayer film (2)

The preparation of elastic HOF-TJ-1/Y@PDMS bilayer film (**2**) is similarly with that of **1**, except that 0.01 g R powder is replaced by 0.01 g Y powder.

### 8. Preparation of elastic HOF-TJ-1/G@PDMS bilayer film (3)

The preparation of elastic HOF-TJ-1/Y@PDMS bilayer film (**3**) is similarly with that of **1**, except that 0.01 g R powder is replaced by 0.01 g G powder.

### 9. Preparation of elastic HOF-TJ-1@PDMS bilayer film (4)

0.005 g **HOF-TJ-1** was evenly dispersed in 0.5 mL of water/ethanol (1 : 1) mixed solution, which was then mixed with 1.1 mL PDMS solution (PDMS : curing agent = 10 : 1) to form a HOF-TJ-1@PDMS mixture. Then 1 mL HOF-TJ-1@PDMS mixture was dropped in a rectangular plastic mold (1.0 × 2.0 cm<sup>2</sup>). The plastic mold was heated at 80 °C for 30 min, during the heating, the generated pores in the mixture should be punctured, which resulted in a HOF-TJ-1@PDMS film. Afterwards, 1.1 mL PDMS solution (PDMS : curing agent = 10 : 1) was mixed with 0.73 mL water/ethanol (1 : 1) mixed solution to form a white PDMS mixture, which was then coated on the upper surface of HOF-TJ-1@PDMS film evenly in the plastic mold. The plastic mold was exposed in atmospheric environment for 12 h. Then the breaker was heated in a 70 °C oven for 30 min. After taking out and cooling the film, the elastic HOF-TJ-1@PDMS bilayer film (**4**) can be acquired.

#### **10. The Anti-interference Measurement of Porous HOF-TJ-1@PDMS Film toward Volatile Organic Compounds and Artificial Sweat**

After exposing the porous HOF-TJ-1@PDMS film in a series of volatile organic compounds such as ammonia, hydrochloric acid, methanol, acetic acid, amine, chloroform, formamide, nitrobenzene, formaldehyde, benzaldehyde, methylamine and diethylamine for 10 min, respectively, the emission spectra of HOF-TJ-1@PDMS film were measured and compared with blank.

The artificial sweat was prepared by dissolving NaCl, KCl, Na<sub>2</sub>SO<sub>4</sub>, NH<sub>4</sub>Cl, and ascorbic acid into aqueous solution with concentration of 40, 2.5, 1.2, 4.5 and 0.03 mmol/L, respectively. After immersing HOF-TJ-1@PDMS film in the artificial sweat for 10 min, the emission spectrum of HOF-TJ-1@PDMS film was measured and compared with blank.

#### **11. Single-Crystal X-ray Diffraction Determination**

The crystallographic data of **HOF-TJ-1** was collected at 77 K on a Bruker Apex II diffractometer (D8 VENTURE) equipped with CCD two-dimensional detector fitted with Mo K $\alpha$  radiation ( $\lambda$  = 0.71073 Å). Through using the program SADABS, the multi-scan absorption corrections and routine Lorentz polarization were triumphantly acquired. The structure was solved with the Bruker ShelXT3 structure solution program using Intrinsic Phasing. Then using Olex2,<sup>1</sup> the structure was refined with the ShelXL5 refinement package using Least Square minimization. Anisotropic thermal parameters were used for the non-hydrogen atoms. H atoms attached to carbon and hydroxyl oxygen atoms were positioned geometrically and constrained to ride on their parent atoms. Crystal data as well as the details of data collection and refinements for the complexes are summarized in [Table S1](#). The supplementary crystallographic data for **HOF-TJ-1** (CCDC 2210794) can be found free of charge from the Cambridge Crystallographic Data Center via [www.ccdc.cam.ac.uk/data\\_request/cif](http://www.ccdc.cam.ac.uk/data_request/cif).

#### **Reference**

[1] O. V. Dolomanov, L. J. Bourhis, R. J. Gildea, J. A. K. Howard, H. J. Puschmann, *Appl. Cryst.* **2009**, *42*, 339–341.

#### **12. Density Functional Theory (DFT) Calculation**

The density functional theory (DFT) calculation was carried to optimize molecule structure of **HOF-TJ-1** by using Gaussian 16W package based on B3LYP/6-31G basis group and method. The HUMO-LUMO of **HOF-TJ-1** molecule was acquired by inputting *chk.* files of optimized structure into GaussView 6.0 package.



### 13. Mechanical Simulation

Finite element simulation is implemented by using COMSOL Multiphysics 6.0 software. Structure mechanics module is employed to construct all simulation models. For building all simulation models, solid mechanics and porous elastic solid mechanics are set as physical fields. For stretched, bended and pressed mechanochromism, four 2-D porous PDMS skin models are constructed with stretched, bended and pressed deformation processes, respectively. The pore diameter in all PDMS skin models is set as 0.586 mm. For parameter generation of intrinsic physical property of PDMS material, density ( $\rho$ ) is 970 kg/m<sup>3</sup>, Young's modulus (E) is 750 kPa, and Poisson's ratio ( $\nu$ ) is 0.49. Appropriate stretched, bended and pressed strains are set to ensure stability of specified displacement. And suitable stress variation ranges are modulated for better observation of force change in deformation process.

### 14. Skin Sensor Array Model Simulation

In the 40 × 50 skin sensor array, each sensor based on **1** possesses the size of 0.04 × 0.04 cm<sup>2</sup>. Each sensor was treated as a stress point, 40 × 50 stress points form the skin sensor array for fingerprint texture recognition. In the 60 × 60 skin sensor array, each sensor based on **1** possesses the size of 0.35 × 0.35 cm<sup>2</sup>. Each sensor was treated as a stress point, 60 × 60 stress points form the skin sensor array for palm texture recognition. All  $(l - l_0)/l_0$  values at each stress point can construct the 3-D texture images of fingerprint and palm. The optical noise was randomly added on none-stress points.

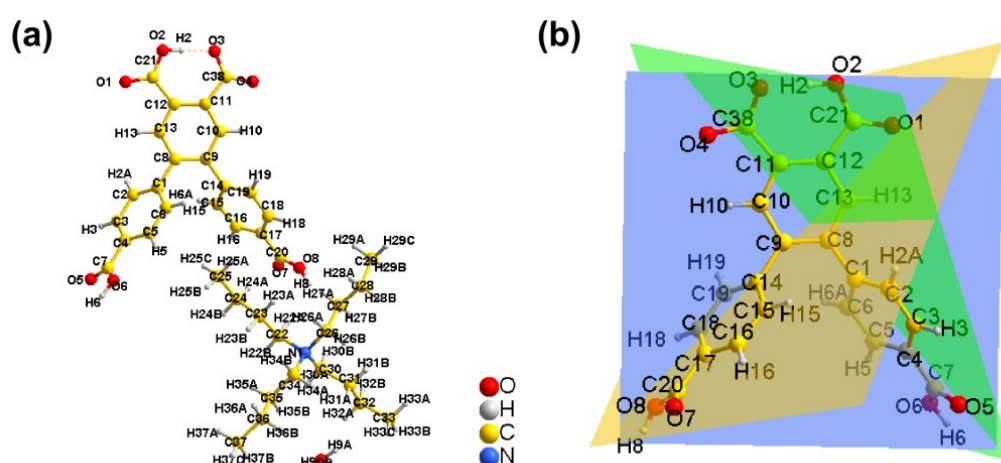

**Fig. S1.** (a) Single molecule structure of **HOF-TJ-1**. (b) The angle between plane 1 (blue) and plane 2 (yellow) is 59.917°, the angle between plane 1 (blue) and plane 3 (green) is 55.213°, the angle between plane 2 (yellow) and plane 3 (green) is 68.908°. Plane 1: C8–C13 atoms; Plane 2: C1–C6 atoms; Plane 3: C14–C19 atoms.

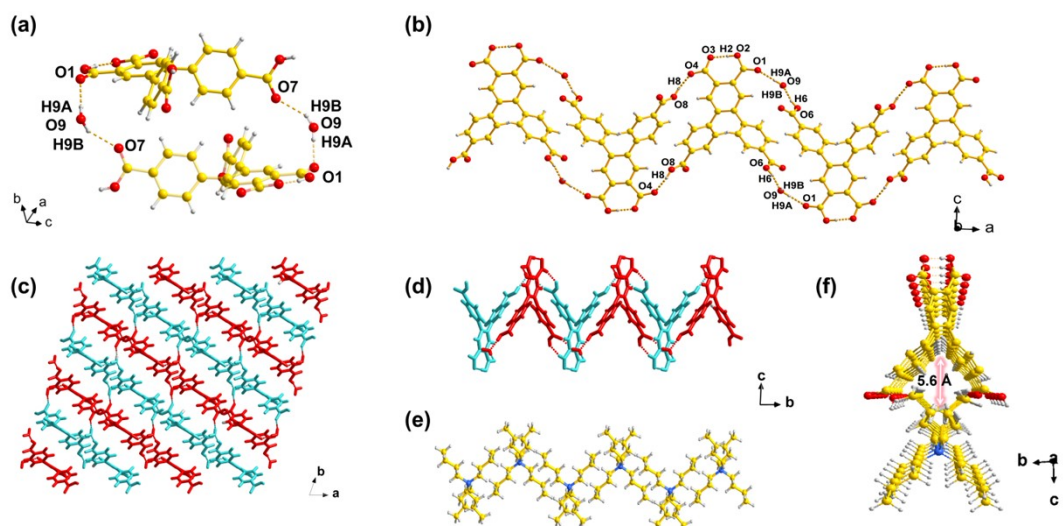

**Fig. S2.** (a) Two BPA<sup>-</sup> anions connected by two H<sub>2</sub>O molecules *via* hydrogen bond interaction along *bc* plane. (b) Adjacent BPA<sup>-</sup> anions linked by hydrogen bond forms a 1-D chain along *ac* plane. (c) Adjacent 1-D chain of BPA<sup>-</sup> anions connect with each other to form a 2-D BPA<sup>-</sup> layer based on hydrogen bond interaction along *ab* plane. (d–e) The polyline-type structure of separate BPA<sup>-</sup> anion layer and TBA<sup>+</sup> cation layer viewed along *a* axis. (f) The micropore structure with ca. 5.6 Å diameter between BPA<sup>-</sup> anion and TBA<sup>+</sup> cation viewed along *a* axis.

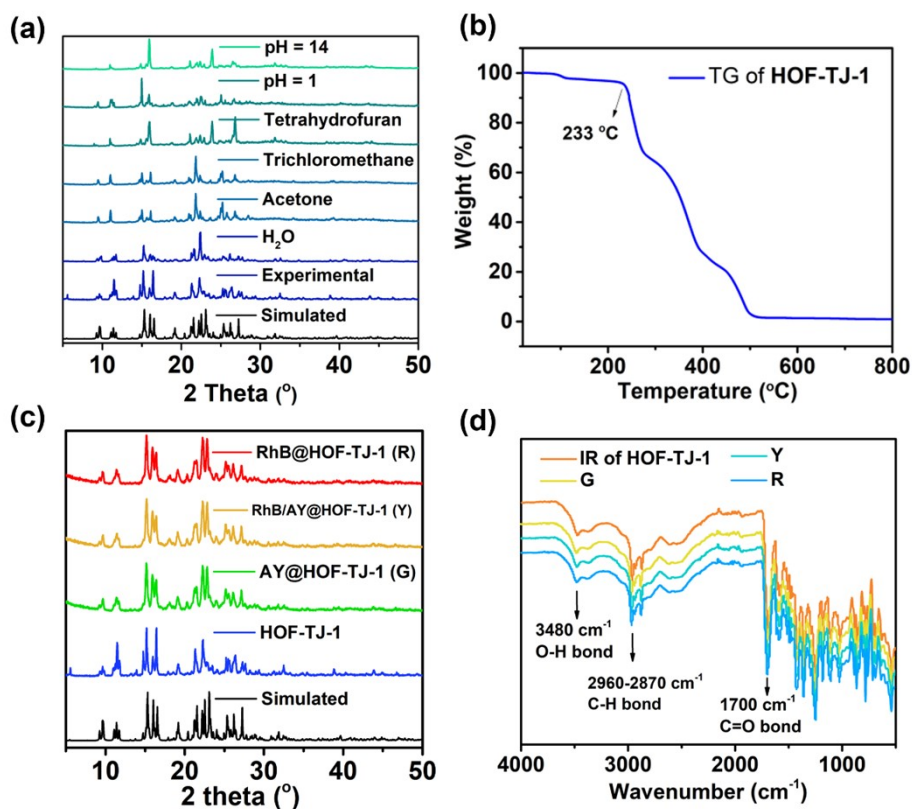

**Fig. S3.** (a) PXRD patterns of **HOF-TJ-1** indicating chemical stability of **HOF-TJ-1** immersed in H<sub>2</sub>O, acetone, trichloromethane, tetrahydrofuran, alkaline (pH = 14) and acidic aqueous (pH = 1) solutions. (b) TG curve of **HOF-TJ-1**. (c) PXRD patterns of **HOF-TJ-1**, **R**, **Y** and **G**. (d) IR spectra of **HOF-TJ-1**, **R**, **Y** and **G**.

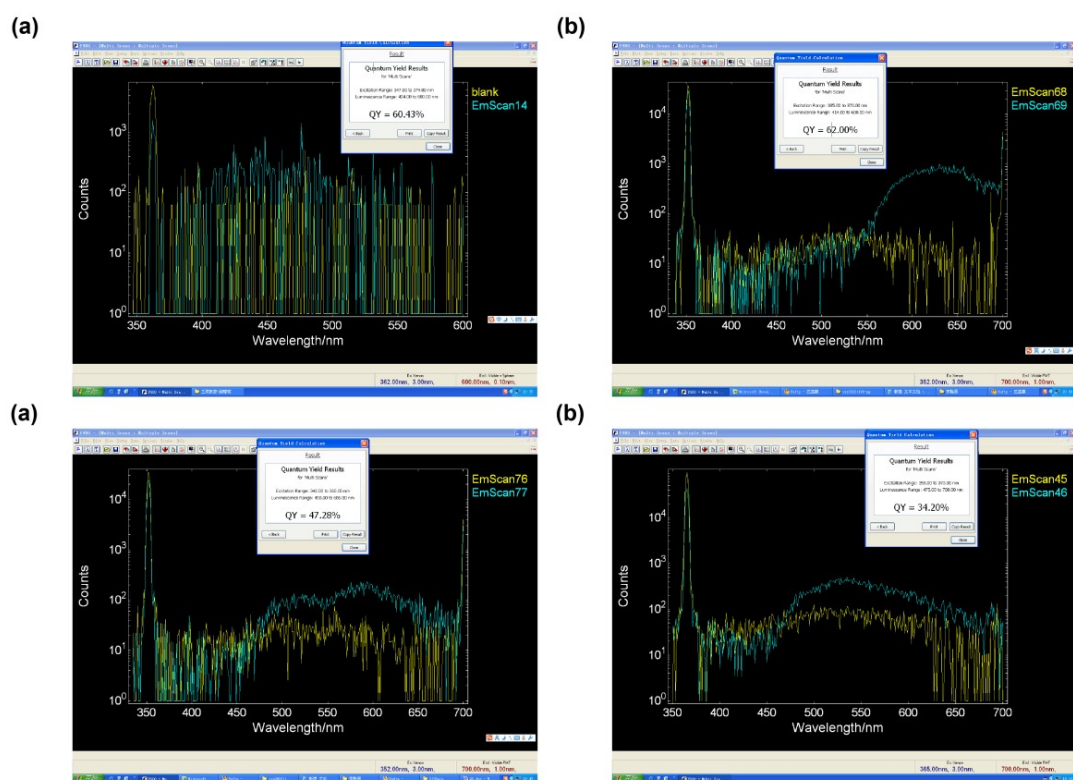

**Fig. S4.** (a-d) Photoluminescence quantum yield of **HOF-TJ-1** (60.43%), **R** (62.00%), **Y** (47.28%) and **G** (34.20%).

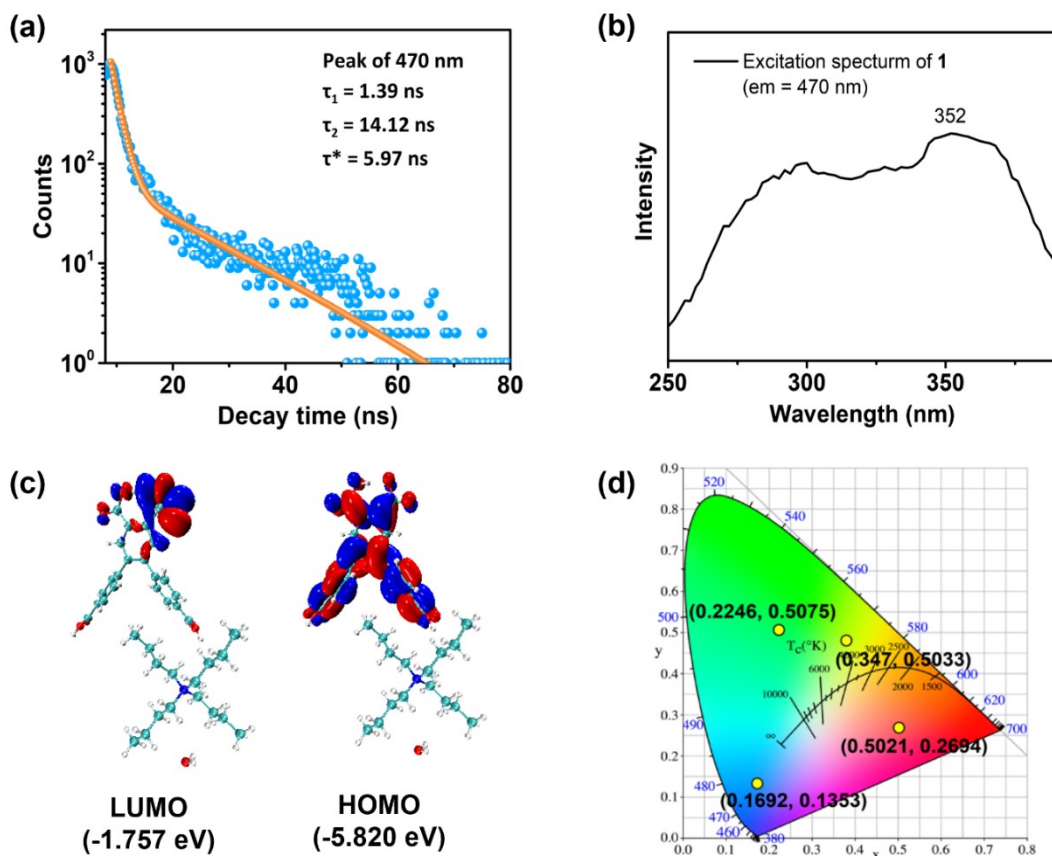

**Fig. S5.** (a) Fluorescence lifetime ( $\lambda_{em} = 470$  nm) of **HOF-TJ-1**. (b) Excitation spectrum of **HOF-TJ-1** ( $\lambda_{em} = 470$  nm). (c) LUMO (-1.757 eV) and HOMO (-5.820 eV) orbit distribution of **HOF-TJ-1**. (d) CIE coordinates of **HOF-TJ-1** (0.1692, 0.1353), R (0.5021, 0.2694), Y (0.347, 0.5033) and G (0.2246, 0.5075).

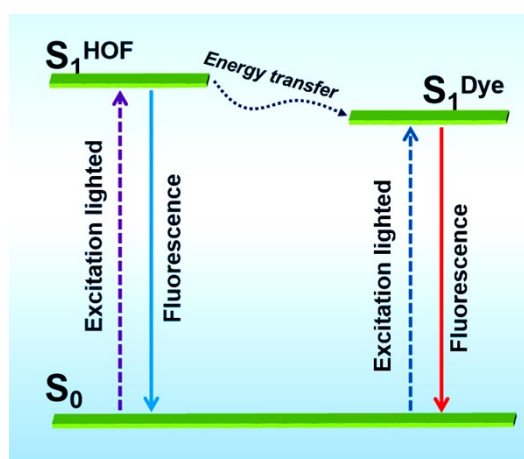

**Fig. S6.** Schematic image of energy transfer from  $S_1^{HOF}$  to  $S_1^{Dye}$  state.

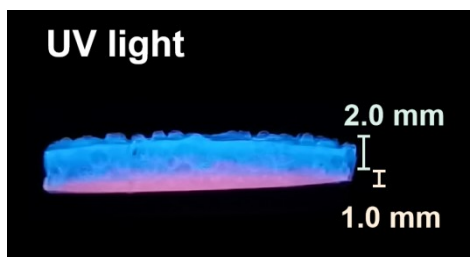

**Fig. S7.** The side view of **1** with bilayer structure under 365 nm UV light, the thickness of top and bottom layers are respectively 2.0 and 1.0 mm.

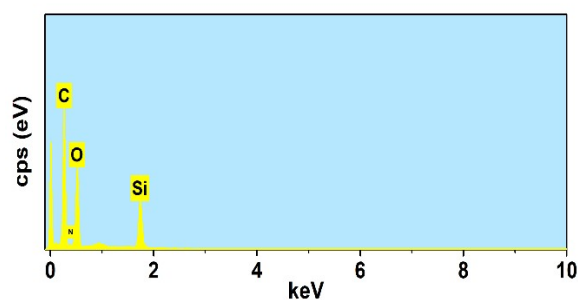

**Fig. S8.** EDX spectrum of HOF-TJ-1@PDMS film demonstrating the element content of C (54.12%), Si (12.39%), O (32.84%) and N (0.65%).

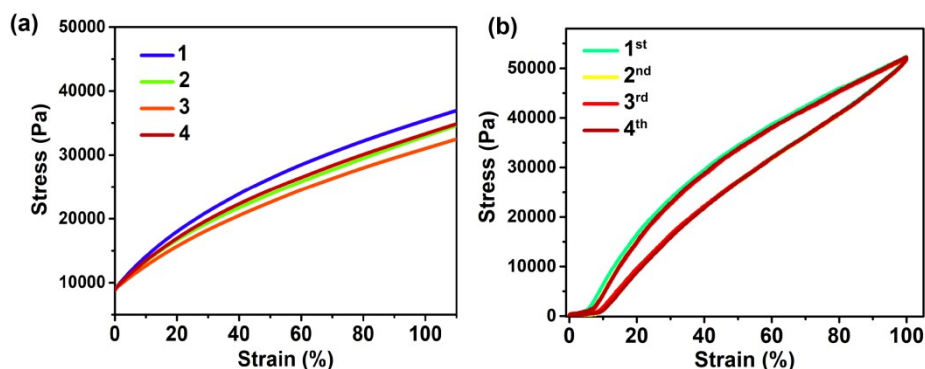

**Fig. S9.** (a) The uniaxial stretching strain curves of **1**–**4**. (b) Uniaxial stretching strain cycle of four times of **1**.

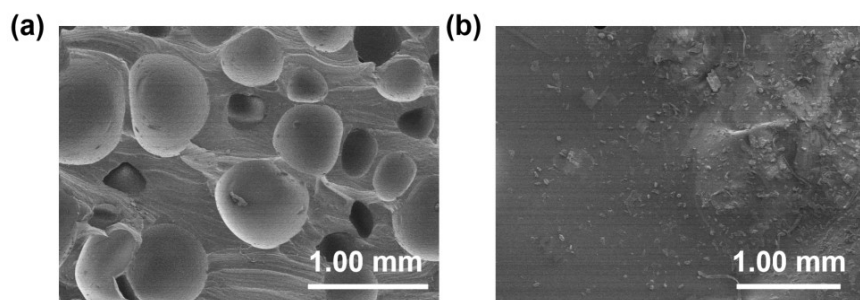

**Fig. S10.** (a) SEM picture of porous HOF-TJ-1@PDMS film ( $V_{\text{PDMS}}/V_{\text{H}_2\text{O}}/V_{\text{ethanol}} = 2/1/1$ ). (b) SEM picture of porous HOF-TJ-1@PDMS film ( $V_{\text{PDMS}}/V_{\text{H}_2\text{O}}/V_{\text{ethanol}} = 1/0/0$ ).



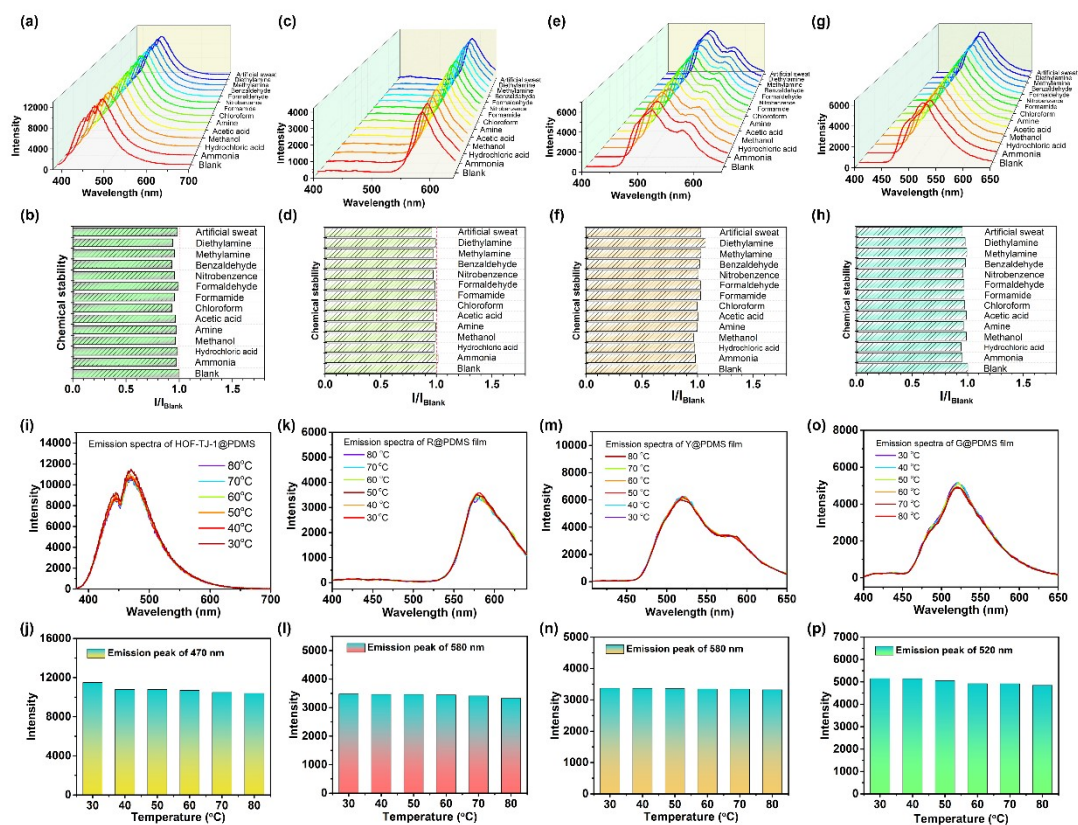

**Fig. S11.** The luminescence chemical stability of porous HOF-TJ-1@PDMS film (a–b), R@PDMS film (c–d), G@PDMS film (e–f) and Y@PDMS film (g–h) after exposing in 12 volatile organic compounds such as ammonia, hydrochloric acid, methanol, acetic acid, amine, chloroform, formamide, nitrobenzene, formaldehyde, benzaldehyde, methylamine and diethylamine for 10 min, and immersing in artificial sweat for 10 min. The thermal stability of porous HOF-TJ-1@PDMS film (i–j), R@PDMS film (k–l), G@PDMS film (m–n) and Y@PDMS film (o–p) in 30–80 °C temperature range.

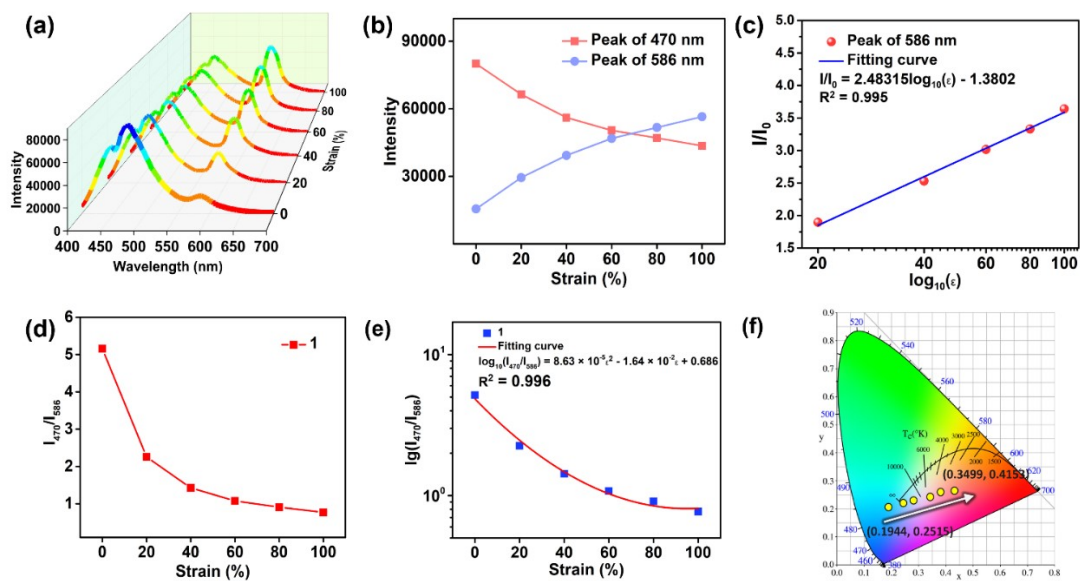

**Fig. S12.** (a) Emission spectra of **1** upon different stretching strains (0–100% strain,  $\lambda_{\text{ex}} = 365$  nm). (b) Dependence of emission intensity of 470 and 586 nm peaks on stretching strain of **1**. (c) Calibration curve of  $I/I_0$  at 586 nm toward  $\log_{10}(\epsilon)$  upon 0–100% strain for **1**. ( $\lambda_{\text{ex}} = 365$  nm). (d) Dependence of ratio of  $I_{470}/I_{586}$  on stretching strain of **1**. (e) Calibration curve of  $\log_{10}(I_{470}/I_{586})$  toward stretching strain upon 0–100% strain for **1**. ( $\lambda_{\text{ex}} = 365$  nm). (f) CIE coordinates of **1** upon different stretching strains.

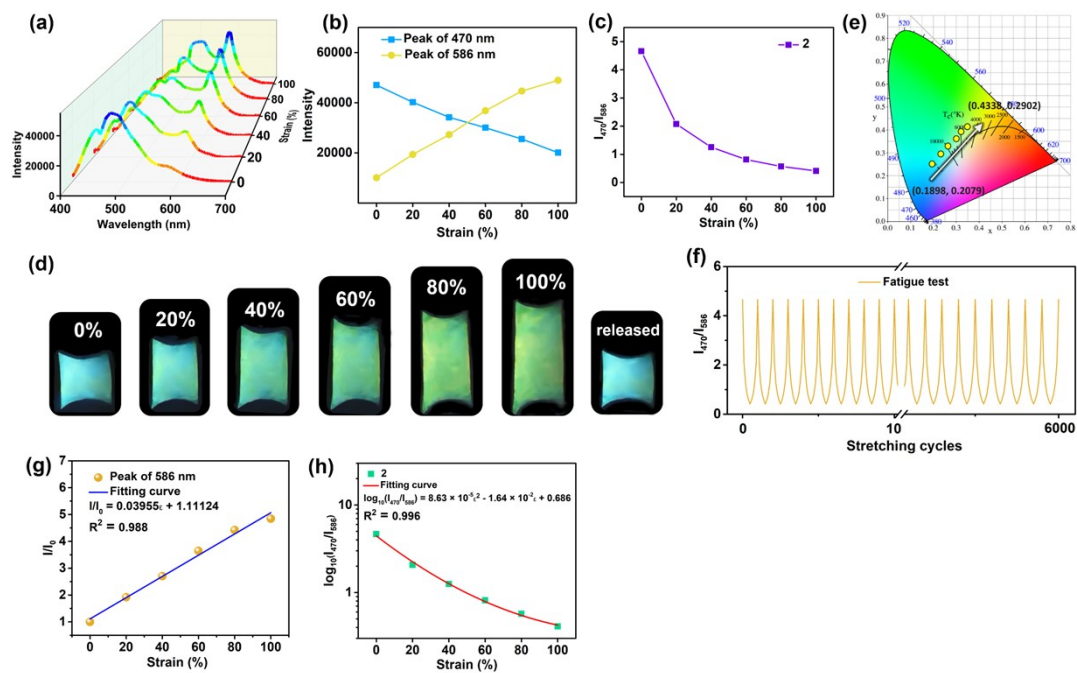

**Fig. S13.** (a) Emission spectra of **2** upon different stretching strains (0–100% strain,  $\lambda_{\text{ex}} = 365$  nm). (b) Dependence of emission intensity of 470 and 586 nm peaks on stretching strain of **2**. (c) Dependence of ratio of  $I_{470}/I_{586}$  on stretching strain of **2**. (d) Luminescence pictures of **2** upon different stretching strains (0–100% strain,  $\lambda_{\text{ex}} = 365$  nm). (e) CIE coordinates of **2** upon different stretching strains. (f) The stretching cycle experiment of **2**. (g) Calibration curve of  $I/I_0$  at 586 nm toward stretching strain upon 0–100% strain for **2**. ( $\lambda_{\text{ex}} = 365$  nm). (h) Calibration curve of  $I/I_0$  at 586 nm toward stretching strain upon 0–100% strain for **2**. ( $\lambda_{\text{ex}} = 365$  nm).



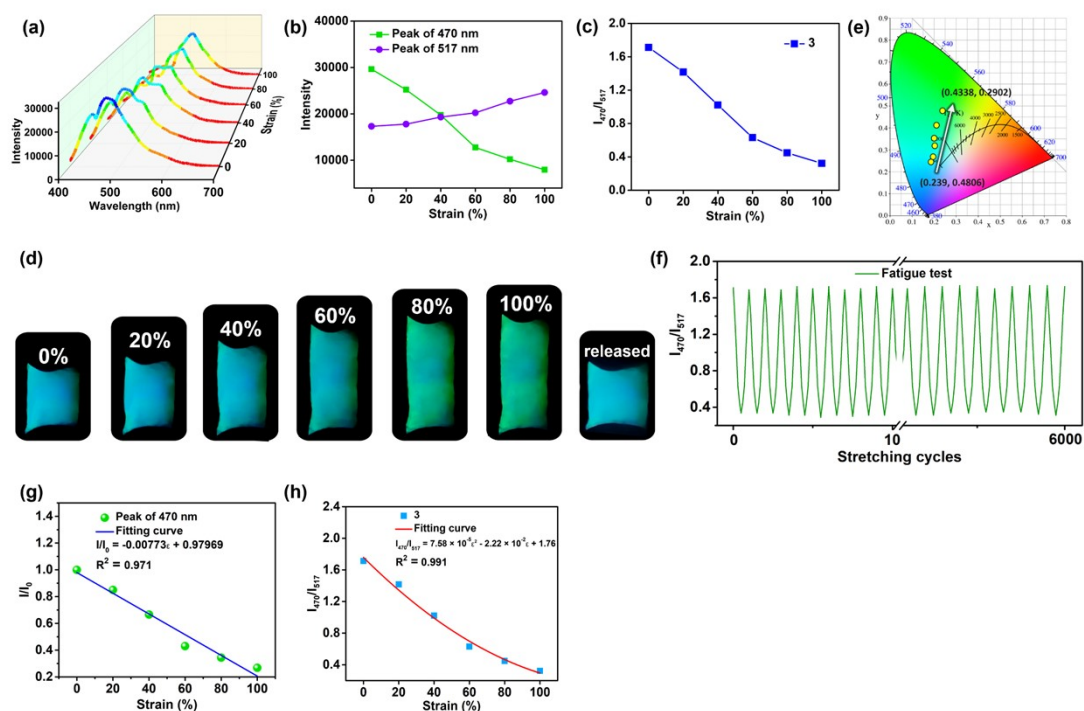

**Fig. S14.** (a) Emission spectra of **3** upon different stretching strains (0–100% strain,  $\lambda_{\text{ex}} = 365$  nm). (b) Dependence of emission intensity of 470 and 517 nm peaks on stretching strain of **3**. (c) Dependence of ratio of  $I_{470}/I_{517}$  on stretching strain of **3**. (d) Luminescence pictures of **3** upon different stretching strains (0–100% strain,  $\lambda_{\text{ex}} = 365$  nm). (e) CIE coordinates of **3** upon different stretching strains. (f) The stretching cycle experiment of **3**. (g) Calibration curve of  $I/I_0$  at 470 nm toward stretching strain upon 0–100% strain for **3** ( $\lambda_{\text{ex}} = 365$  nm). (h) Calibration curve of  $I/I_0$  at 517 nm toward stretching strain upon 0–100% strain for **3** ( $\lambda_{\text{ex}} = 365$  nm).

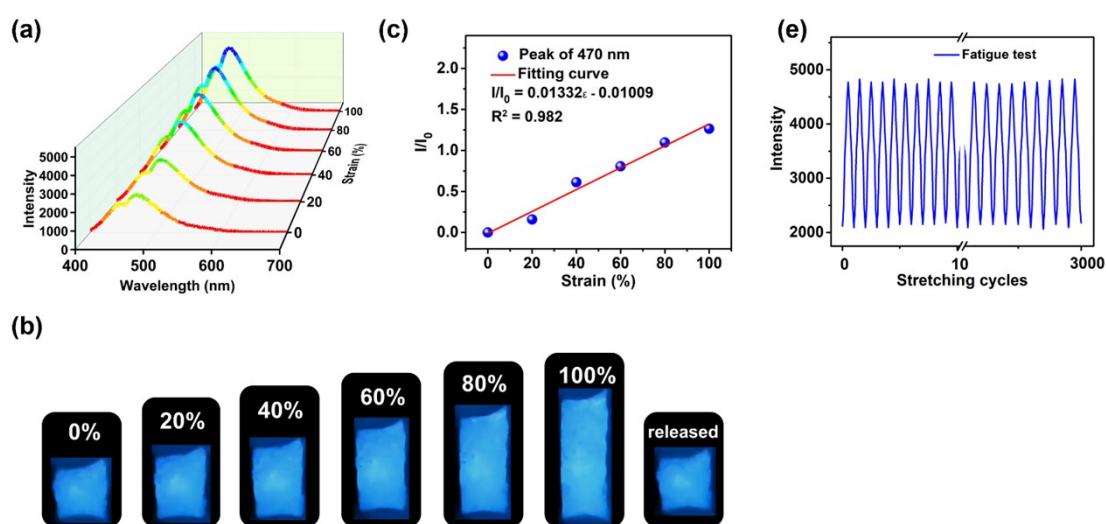

**Fig. S15.** (a) Emission spectra of **4** upon different stretching strains (0–100% strain,  $\lambda_{\text{ex}} = 365$  nm). (b) Luminescence pictures of **4** upon different stretching strains (0–100% strain,  $\lambda_{\text{ex}} = 365$  nm). (c) Calibration curve of  $I/I_0$  at 470 nm toward stretching strain upon 0–100% strain for **4** ( $\lambda_{\text{ex}} = 365$  nm). (d) The stretching cycle experiment of **4**.

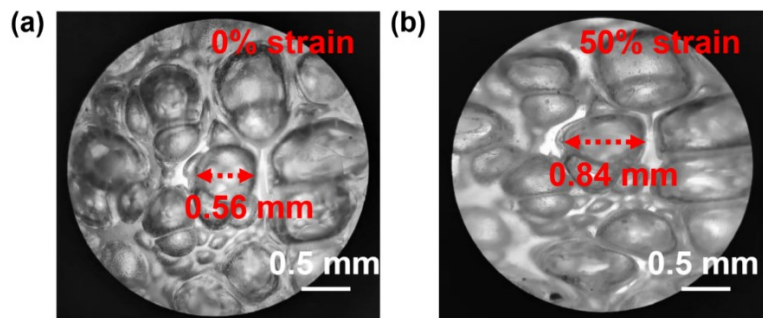

**Fig. S16.** Microscope pictures of porous HOF-TJ-1@PDMS layer upon 0% (a) and 50% (b) stretching strains.

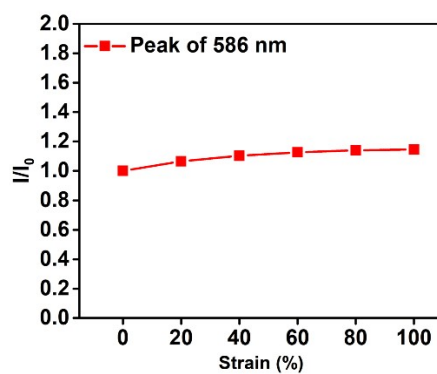

**Fig. S17.** Dependence of  $I/I_0$  on stretching strain of R@PDMS film (0–100% strain).

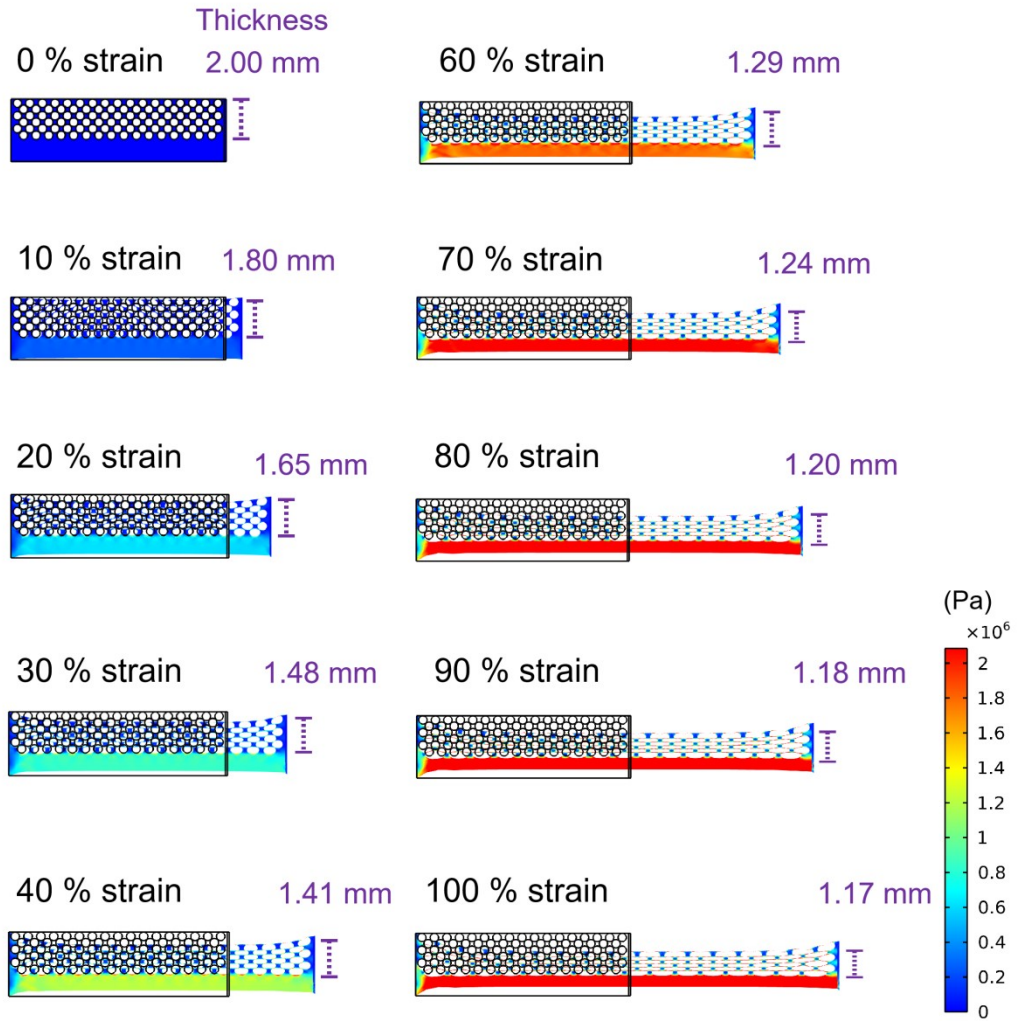

**Fig. S18.** FES 2-D mechanics stretching model of side view upon 0, 10, 20, 30, 40, 60, 70, 80, 90 and 100% strain for **1**.

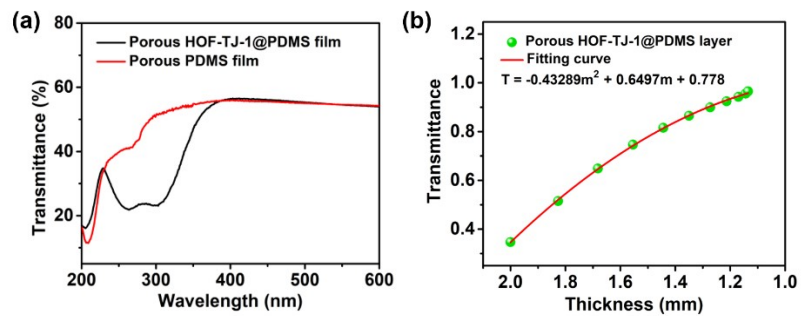

**Fig. S19.** (a) Transmittance spectra of porous HOF-TJ-1@PDMS film and porous PDMS film. (b) The variation of thickness and transparency for the porous HOF-TJ-1@PDMS (top) layer.

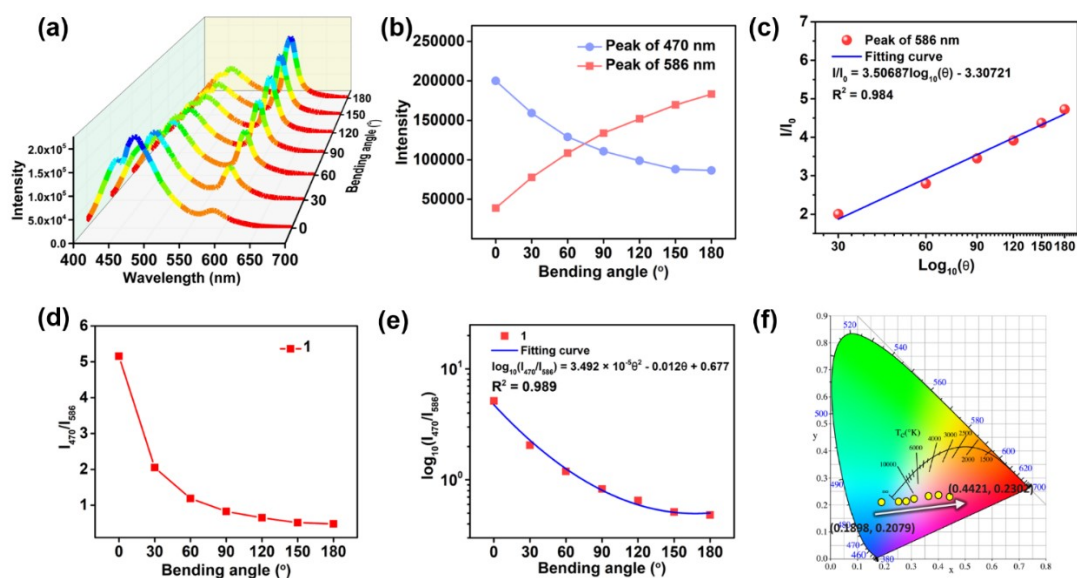

**Fig. S20.** (a) Emission spectra of **1** with 0–180° bending angle ( $\lambda_{\text{ex}} = 365$  nm). (b) Dependence of emission intensity of 470 and 586 nm peaks on bending strain of **1**. (c) Calibration curve of  $I/I_0$  at 586 nm toward  $\log_{10}(\theta)$  with 0–180° bending angle for **1**. ( $\lambda_{\text{ex}} = 365$  nm). (d) Dependence of ratio of  $I_{470}/I_{586}$  on bending strain of **1**. (e) Calibration curve of  $\log_{10}(I_{470}/I_{586})$  toward bending strain with 0–180° bending angle for **1**. ( $\lambda_{\text{ex}} = 365$  nm). (f) CIE coordinates of **1** upon different bending strains.

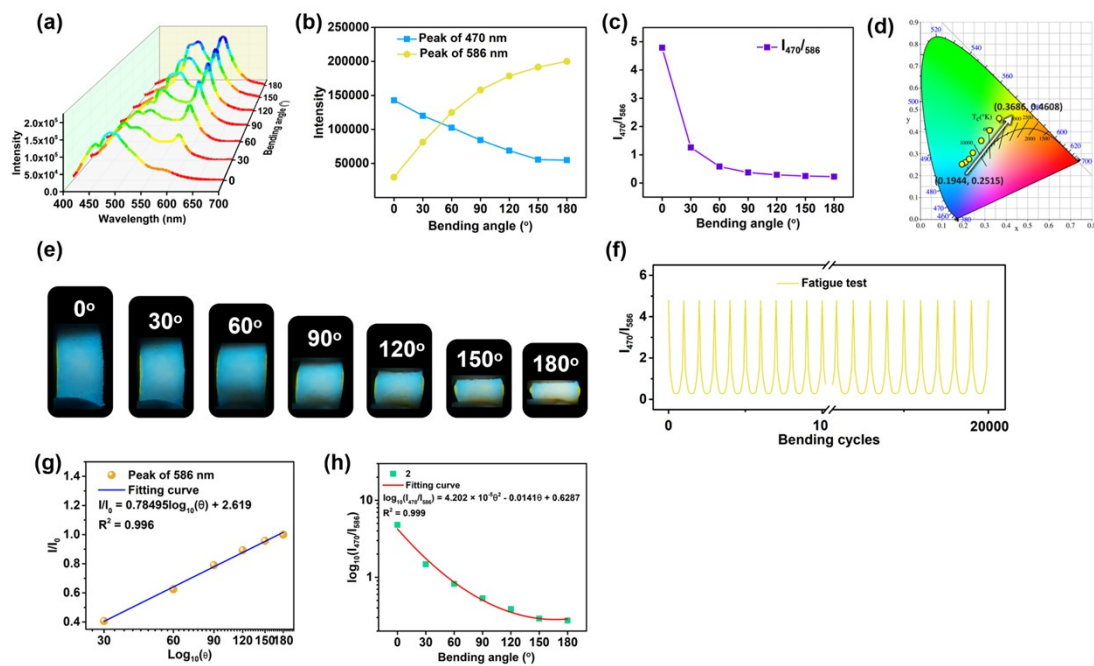

**Fig. S21.** (a) Emission spectra of **2** with 0–180° bending angle ( $\lambda_{\text{ex}} = 365$  nm). (b) Dependence of emission intensity of 470 and 586 nm peaks on bending strain of **2**. (c) Dependence of ratio of  $I_{470}/I_{586}$  on bending strain of **2**. (d) CIE coordinates of **2** upon different bending strains. (e) Luminescence pictures of **2** with 0–180° bending angle ( $\lambda_{\text{ex}} = 365$  nm). (f) The bending cycle experiment of **2**. (g) Calibration curve of  $I/I_0$  at 586 nm toward  $\log_{10}(\theta)$  with 0–180° bending angle ( $\lambda_{\text{ex}} = 365$  nm) for **2**. (h) Calibration curve of  $I/I_0$  at 586 nm toward bending strain with 0–180° bending angle ( $\lambda_{\text{ex}} = 365$  nm) for **2**. ( $\lambda_{\text{ex}} = 365$  nm).

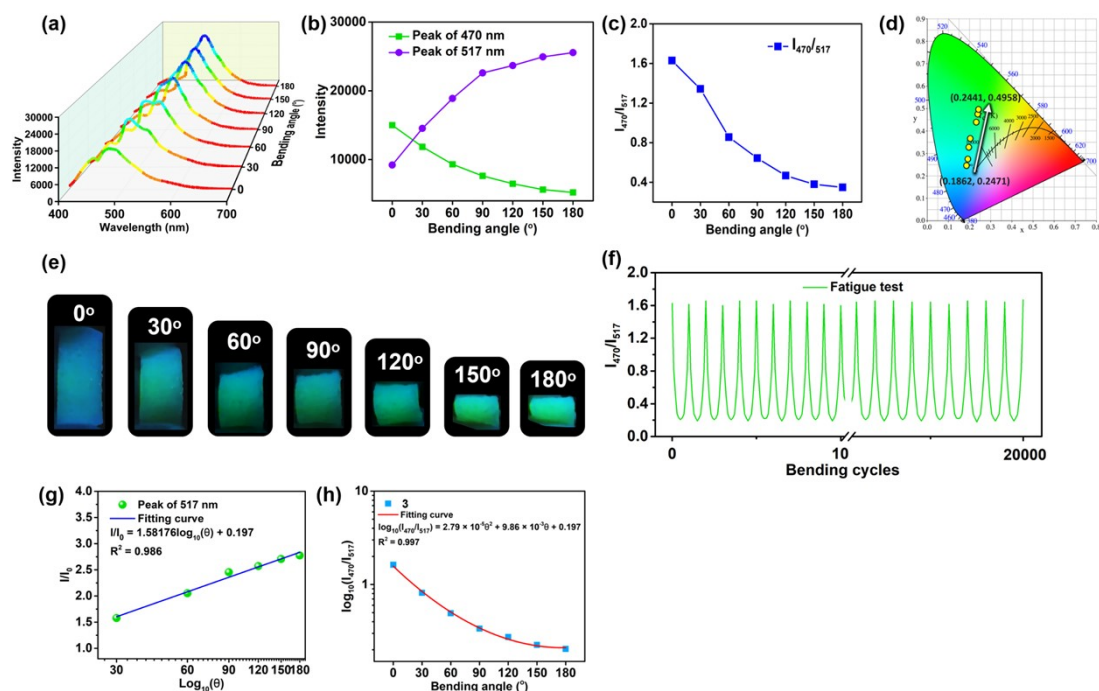

**Fig. S22.** (a) Emission spectra of **3** with 0–180° bending angle ( $\lambda_{\text{ex}} = 365$  nm). (b) Dependence of emission intensity of 470 and 517 nm peaks on bending strain of **3**. (c) Dependence of ratio of  $I_{470}/I_{517}$  on bending strain of **3**. (d) CIE coordinates of **3** upon different bending strains. (e) Luminescence pictures of **3** with 0–180° bending angle ( $\lambda_{\text{ex}} = 365$  nm). (f) The bending cycle experiment of **3**. (g) Calibration curve of  $I/I_0$  at 470 nm toward  $\log_{10}(\theta)$  with 0–180° bending angle ( $\lambda_{\text{ex}} = 365$  nm). (h) Calibration curve of  $I/I_0$  at 517 nm toward bending strain with 0–180° bending angle ( $\lambda_{\text{ex}} = 365$  nm).

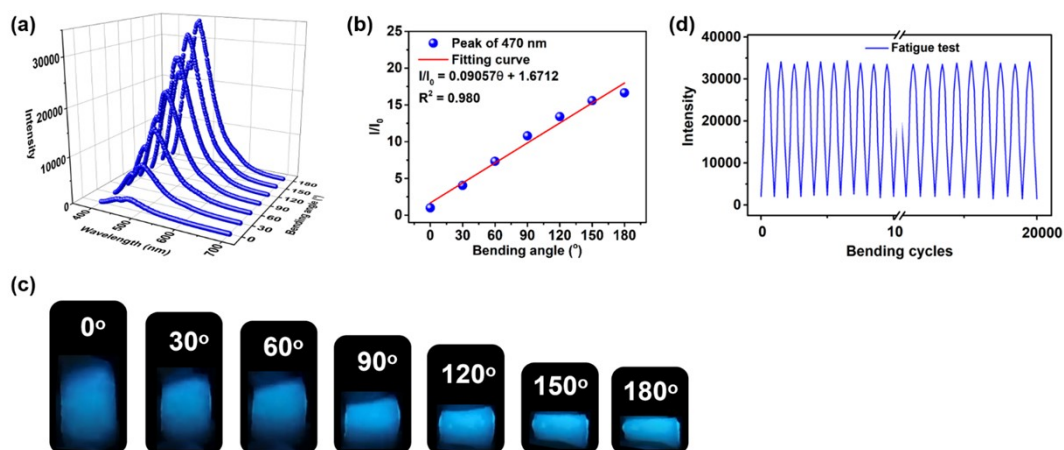

**Fig. S23.** (a) Emission spectra of **4** with 0–180° bending angle ( $\lambda_{\text{ex}} = 365$  nm). (b) Calibration curve of  $I/I_0$  at 470 nm toward bending strain with 0–180° bending angle ( $\lambda_{\text{ex}} = 365$  nm) for **4** ( $\lambda_{\text{ex}} = 365$  nm). (c) Luminescence pictures of **4** with 0–180° bending angle ( $\lambda_{\text{ex}} = 365$  nm). (d) The bending cycle experiment of **4**.



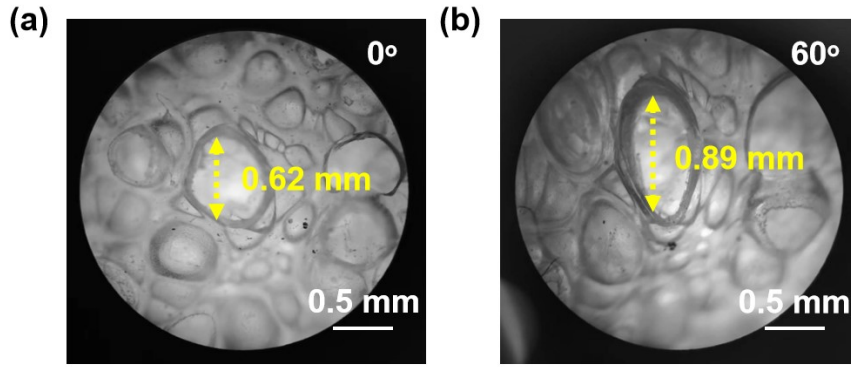

Fig. S24. Microscope pictures of porous HOF-TJ-1@PDMS layer with 0° (a) and 60° (b) bending angles.

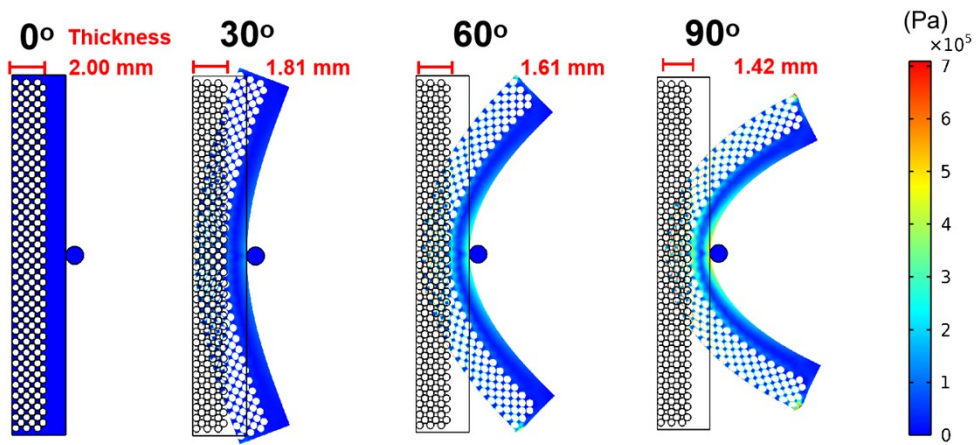

Fig. S25. FES 2-D mechanics bending model of side view with 0°, 30°, 60° and 90° angles for 1.

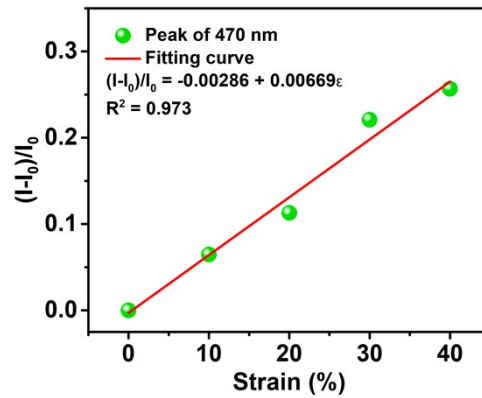

Fig. S26. Calibration curve of  $(l - l_0)/l_0$  at 470 nm toward pressing strain under 0–40% press strain.

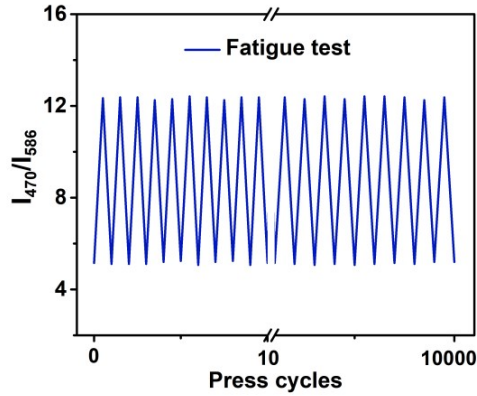

Fig. S27. The pressing cycle experiment of **1**.

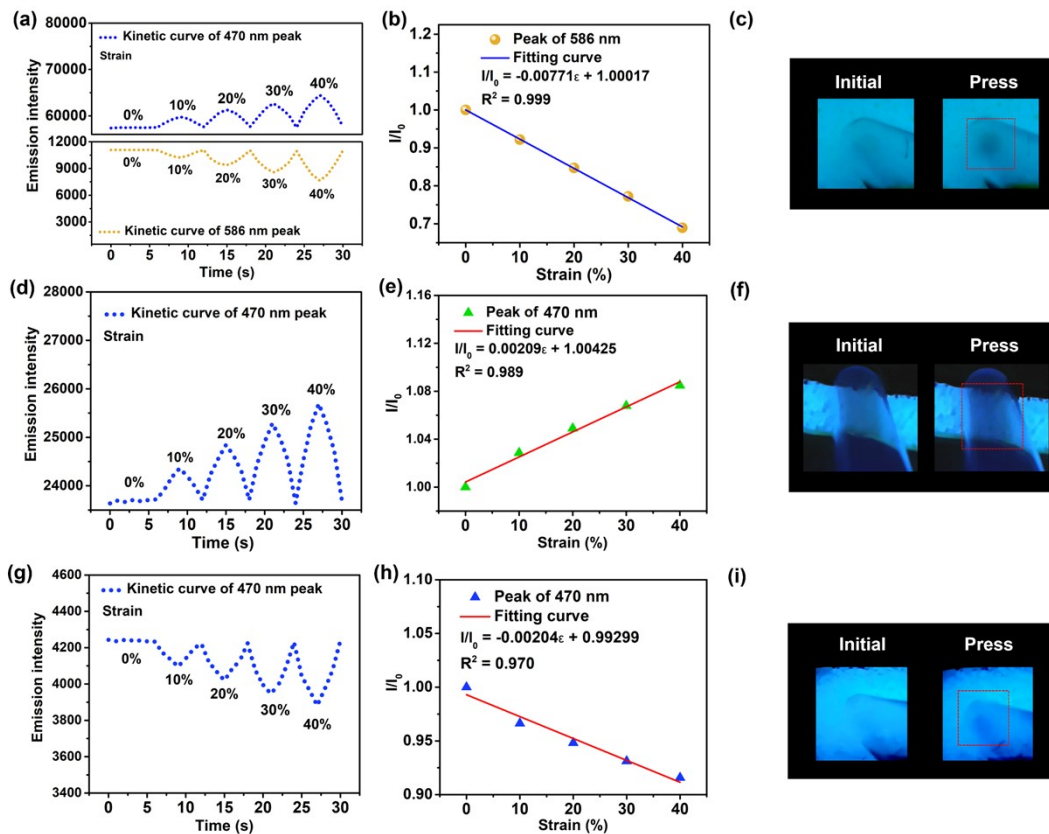

Fig. S28. (a) Kinetic curves of 470 and 586 nm peaks demonstrating the change of emission intensity upon 0, 10, 20, 30, and 40% press strains for **2**. (b) Calibration curve of  $I/I_0$  at 586 nm toward pressing strain under 0–40% press strain for **2**. ( $\lambda_{ex} = 310$  nm). (c) Luminescence pictures of initial **2** and **2** pressed by a glass tube ( $\lambda_{ex} = 310$  nm). (d) Kinetic curves of 470 nm peak demonstrating the change of emission intensity upon 0, 10, 20, 30, and 40% press strains for **3**. (e) Calibration curve of  $I/I_0$  of 470 nm peak toward pressing strain upon 0–40% strain for **3** ( $\lambda_{ex} = 310$  nm). (f) Luminescence pictures of initial **3** and **3** pressed by a glass tube ( $\lambda_{ex} = 310$  nm). (g) Kinetic curves of 470 nm peak demonstrating the change of emission intensity upon 0, 10, 20, 30, and 40% press strains for **4**. (h) Calibration curve of  $I/I_0$  of 470 nm peak toward pressing strain upon 0–40% strain for **4** ( $\lambda_{ex} = 310$  nm). (i) Luminescence pictures of initial **4** and **4** pressed by a glass tube ( $\lambda_{ex} = 310$  nm).



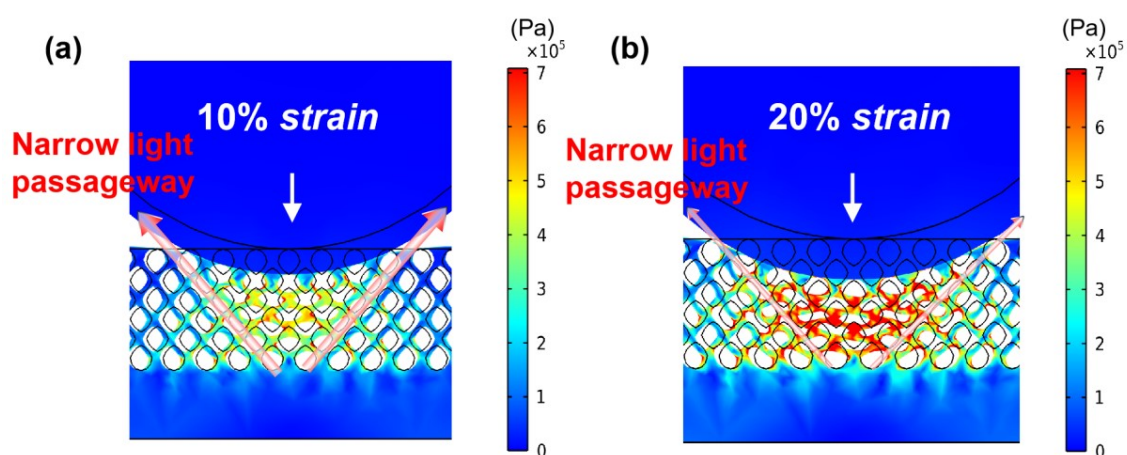

Fig. S29. FES 2-D mechanics pressing model of side view under 10% (a) and 20% (b) pressing strain for **1**.

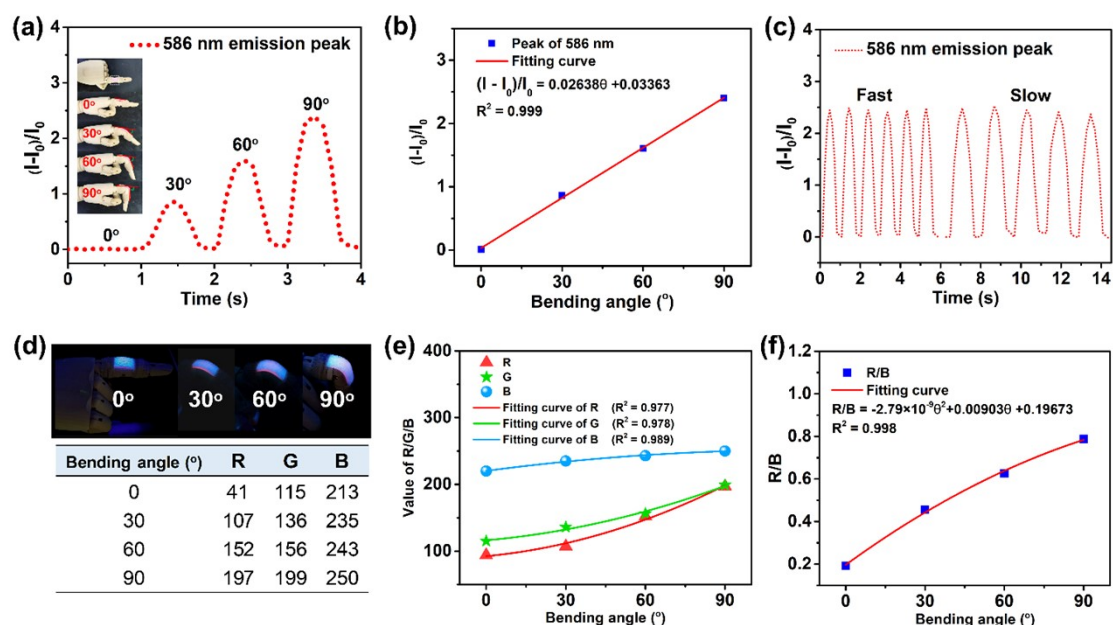

Fig. S30. (a) Kinetic curves of 586 nm peaks demonstrating the change of emission intensity with 0°, 30°, 60°, 90° bending angles for finger bending motion luminescence sensing. (b) Dependence of  $(I - I_0)/I_0$  of 586 nm peaks on bending angle with 0–90°. (c) Kinetic curves of 586 nm peaks demonstrating the change of emission intensity with 90° bending angle for fast and slow finger bending motion. (d) Luminescence pictures of **1** stuck on a finger with 0°, 30°, 60°, 90° bending angles, and relative R.G.B. values at bending center of **1** for finger bending motion chroma sensing. (e) Dependence of R.G.B. values of **1** on bending angle with 0–90°. (f) Dependence of R/B value of **1** on bending angle with 0–90° for finger bending motion chroma sensing.

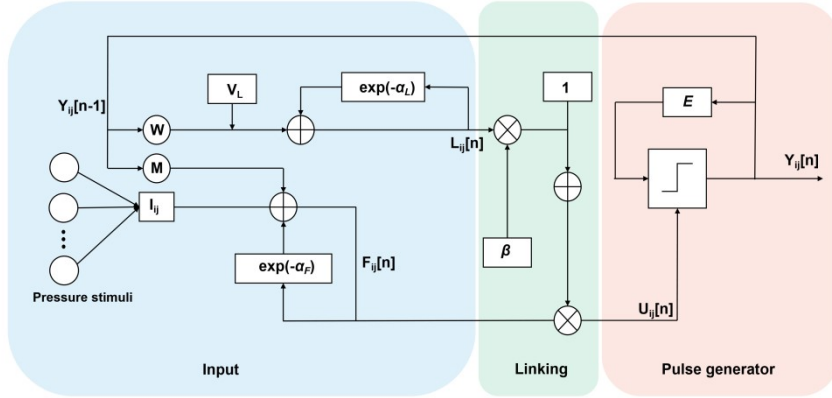

**Fig. S31.** PCNN model constructed based on PMC property of **1** for enhancing tactile signal. Following five equations (1–5) are used for signal enhancing.

$$F_j[n] = e^{-\alpha_F} F_j[n-1] + V_F \sum_k \omega_{kj} Y_j[n-1] + I_j \quad (1)$$

$$L_j[n] = e^{-\alpha_L} L_j[n-1] + V_L \sum_k m_{kj} Y_j[n-1] \quad (2)$$

$$U_j[n] = F_j[n] + (1 + \beta) L_j[n] \quad (3)$$

$$Y_j[n] = \begin{cases} 1 & U_j[n] > E_j[n] \\ 0 & \text{otherwise} \end{cases} \quad (4)$$

$$E_j[n] = e^{-\alpha_E} E_j[n-1] + V_E Y_j[n] \quad (5)$$

The spiking encoded tactile information with various frequencies serves as  $I_{ij}$  at position  $(i, j)$  for the inputs of the PCNN.  $F_{ij}[n]$  is the feedback input of the PCNN at  $(i, j)$ , and  $L_{ij}[n]$  is the linking item.  $U_{ij}[n]$  is the internal activity of PCNN, and  $E_{ij}[n]$  is the dynamic threshold. The pulse output  $Y_{ij}[n]$  is a binary value of either 0 or 1. The inter-connections of  $M$  and  $W$  are the constant synaptic weight matrices for the feeding and linking inputs, respectively. The value of matrix element  $\omega_{ij,k,l}$  and  $m_{ij,k,l}$  determine the synaptic weight strength for the synaptic weight matrices.  $\alpha_F$ ,  $\alpha_L$ , and  $\alpha_E$  are the attenuation time constants of  $F_{ij}[n]$ ,  $L_{ij}[n]$  and  $E_{ij}[n]$ , respectively.  $V_F$ ,  $V_L$  and  $V_E$  are the inherent voltage potentials of  $F_{ij}[n]$ ,  $L_{ij}[n]$  and  $E_{ij}[n]$ , respectively.

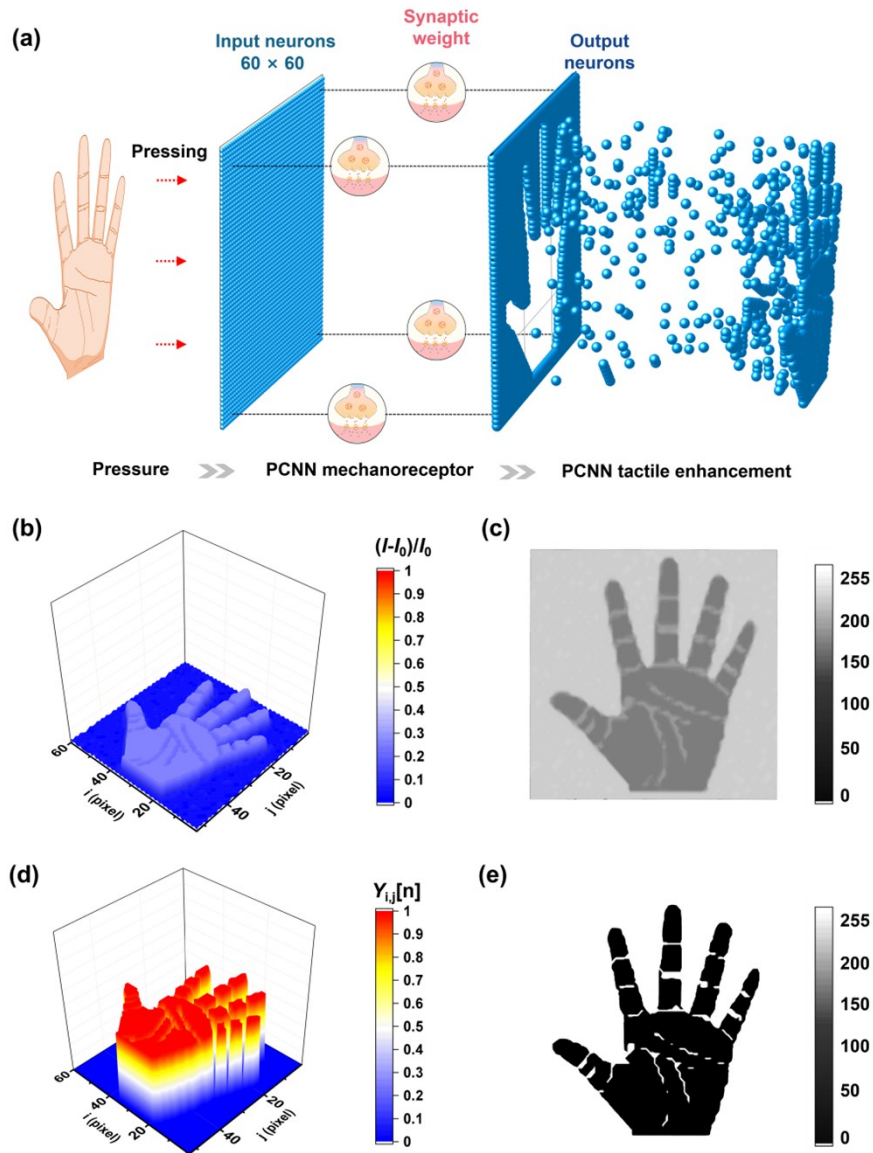

**Fig. S32.** (a) Schematic image demonstrating the  $60 \times 60$  array based on **1** as mechanoreceptor for collecting initial palm texture, and PCNN model using to enhancing palm texture signal. (b) 3-D palm texture model obtained by  $60 \times 60$  array based on **1**. (c) Initial 2-D palm texture gray image transformed by 3-D palm texture model. (d) Enhanced 3-D palm texture model obtained by  $60 \times 60$  array based on **1**. (e) Enhanced 2-D palm texture gray image transformed by 3-D palm texture model.

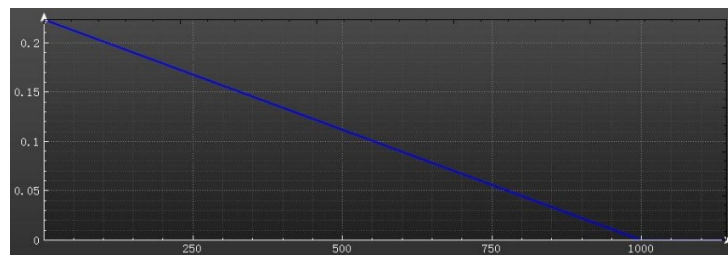

**Fig. S33.** Training curve of BPNN1 model, the ordinate value decreases to 0, suggesting the successful fitting of BPNN1 model.

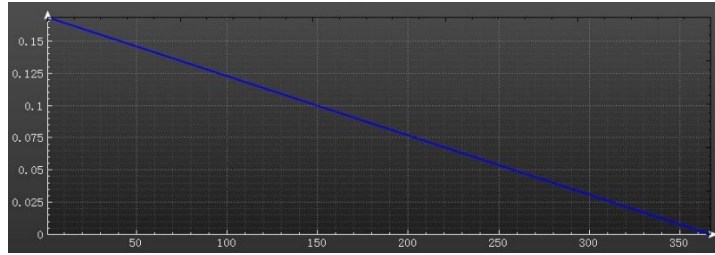

**Fig. S34.** Training curve of BPNN2 model, the ordinate value decreases to 0, suggesting the successful fitting of BPNN2 model.

**Table S1.** An overall comparison of this work and other works about luminescent mechanochromism polymer materials. (“Yes” outside the black circle means that this result is existent; “No” inside the black circle means that this result is non-existent; SMC: Stretched mechanochromism; BMC: Bended mechanochromism; PMC: Pressed mechanochromism)

| Reference                                    | This work | 2   | 3   | 4   | 5   | 6   | 7   | 8   |
|----------------------------------------------|-----------|-----|-----|-----|-----|-----|-----|-----|
| SMC                                          | Yes       | Yes | Yes | Yes | Yes | Yes | Yes | Yes |
| BMC                                          | Yes       | No  |
| PMC                                          | Yes       | No  |
| Human motion sensing                         | Yes       | No  | No  | No  | No  | No  | No  | Yes |
| Hand gesture recognition                     | Yes       | No  |
| Tactile enhanced palm Information collection | Yes       | No  |
| Anti-counterfeiting                          | No        | Yes | No  | No  | No  | No  | No  | No  |
| Bulging pressure sensing                     | No        | Yes | No  | No  | No  | No  | No  | No  |
| Various color change                         | Yes       | Yes | Yes | Yes | Yes | Yes | Yes | No  |
| Finite element simulation                    | Yes       | No  | No  | Yes | No  | No  | No  | No  |

#### Reference

- [2] Q. Zhu and K. V. Vliet, N. Holten-Andersen, A. Miserez, *Adv. Funct. Mater.*, 2019, **29**, 1808191.  
 [3] S. Zeng, D. Zhang, W. Huang, Z. Wang, S. G. Freire, X. Yu, A. T. Smith, E. Y. Huang, H. Nguon and L. Sun, *Nat. Commun.*, 2016, **7**, 11802.  
 [4] M. Raisch, W. Maftuhin, M. Walter and M. Sommer, *Nat. Commun.*, 2021, **12**, 4243  
 [5] S. Thazhathethil, T. Muramatsu, N. Tamaoki, C. Weder and Y. Sagara, *Angew. Chem.*, 2022, e202209225.  
 [6] H. Hu, X. Cheng, Z. Ma, Rint P. Sijbesma and Z. Ma, *J. Am. Chem. Soc.*, 2022, **144**, 9971–9979.  
 [7] Y. Sagara, M. Karman, E. Verde-Sesto, K. Matsuo, Y. Kim, N. Tamaoki and C. Weder, *J. Am. Chem. Soc.*, 2018, **140**, 1584–1587.  
 [8] G. Lin, M. Si, L. Wang, S. Wei, W. Lu, H. Liu, Y. Zhang, D. Li and T. Chen, *Adv. Optical Mater.*, 2022, **10**, 2102306.

**Table S2.** The crystallographic data of HOF-TJ-1.

| Crystal data           | HOF-TJ-1    |
|------------------------|-------------|
| CCDC number            | 2210794     |
| Crystal system         | triclinic   |
| Space group            | <i>P</i> -1 |
| Molecular formula      | C38H51NO9   |
| Formula weight         | 665.80      |
| <i>a</i> / Å           | 9.7279(18)  |
| <i>b</i> / Å           | 12.109(2)   |
| <i>c</i> / Å           | 16.102(3)   |
| $\alpha$ /°            | 87.019(7)   |
| $\beta$ /°             | 89.242(7)   |
| $\gamma$ /°            | 70.646(6)   |
| Volume/ Å <sup>3</sup> | 1787.1(6)   |

|                            |        |
|----------------------------|--------|
| Z                          | 2      |
| Density/ g/cm <sup>3</sup> | 1.237  |
| GOF on F <sup>2</sup>      | 1.041  |
| R1a[ >2σ(l)]               | 0.0843 |
| ωR2b[ >2σ(l)]              | 0.2186 |

**Table S3.** Summary of fluorescence decay lifetime of **1**.

| Sample   | $\lambda_{\text{ex}}$<br>(nm) | $\lambda_{\text{em}}$<br>(nm) | $\tau_1$ (ns) | Percentag |          |               | Percentag |          |          | $\chi^2$ |
|----------|-------------------------------|-------------------------------|---------------|-----------|----------|---------------|-----------|----------|----------|----------|
|          |                               |                               |               | $A_1$     | e<br>(%) | $\tau_2$ (ns) | $A_2$     | e<br>(%) | $\tau^*$ |          |
| <b>1</b> | 379                           | 470                           | 1.39          | 1143.05   | 51.62    | 14.12         | 63.16     | 48.38    | 5.97     | 1.074    |

$$[\tau^* = (A_1\tau_1^2 + A_2\tau_2^2)/(A_1\tau_1 + A_2\tau_2)]$$

**Table S4.** Element contents of C, Si, O, and N in porous HOF-TJ-1@PDMS film.

| Elements | Wt%    |
|----------|--------|
| C        | 54.12  |
| Si       | 12.39  |
| O        | 32.84  |
| N        | 0.65   |
| Total    | 100.00 |

**Table S5.** CIE coordinates of **1**, **2** and **3** with different stretched strains of 0, 20, 40, 60, 80 and 100% ( $\lambda_{\text{ex}} = 365$  nm).

| Strain (%) | <b>1</b> |        | <b>2</b>   |        | <b>3</b> |            |        |        |
|------------|----------|--------|------------|--------|----------|------------|--------|--------|
|            | x        | y      | Strain (%) | x      | y        | Strain (%) | x      | y      |
| 0          | 0.1898   | 0.2079 | 0          | 0.1944 | 0.2515   | 0          | 0.1862 | 0.2471 |
| 20         | 0.2442   | 0.2214 | 20         | 0.2317 | 0.2943   | 20         | 0.1959 | 0.2691 |
| 40         | 0.2814   | 0.2298 | 40         | 0.2639 | 0.33     | 40         | 0.2025 | 0.3186 |
| 60         | 0.3424   | 0.2431 | 60         | 0.3003 | 0.3629   | 60         | 0.1998 | 0.3528 |
| 80         | 0.3816   | 0.2594 | 80         | 0.3213 | 0.3937   | 80         | 0.2109 | 0.412  |
| 100        | 0.4318   | 0.2659 | 100        | 0.3499 | 0.4153   | 100        | 0.239  | 0.4806 |

**Table S6.** Detection limits of **1–4** in stretching, bending and pressing process.

| Sample   | Detection limit (DL) |             |              |
|----------|----------------------|-------------|--------------|
|          | Stretching (%)       | Bending (°) | Pressing (%) |
| <b>1</b> | 0.00321              | 0.00227     | 1.191        |
| <b>2</b> | 0.201                | 0.0101      | 1.033        |
| <b>3</b> | 1.031                | 0.00504     | 2.812        |

4

0.598

0.0880

3.905

**Table S7.** CIE coordinates of **1**, **2** and **3** with different bending angles of 0, 30, 60, 90, 120, 150 and 180° ( $\lambda_{\text{ex}} = 365 \text{ nm}$ ).

| <b>1</b>          |        |        | <b>2</b>          |        |        | <b>3</b>          |        |        |
|-------------------|--------|--------|-------------------|--------|--------|-------------------|--------|--------|
| Bending angle (°) | x      | y      | Bending angle (°) | x      | y      | Bending angle (°) | x      | y      |
| 0                 | 0.1898 | 0.2079 | 0                 | 0.1944 | 0.2515 | 0                 | 0.1862 | 0.2471 |
| 30                | 0.2532 | 0.2114 | 30                | 0.2054 | 0.2571 | 30                | 0.1929 | 0.2751 |
| 60                | 0.2814 | 0.2134 | 60                | 0.2267 | 0.2737 | 60                | 0.1962 | 0.326  |
| 90                | 0.3112 | 0.2231 | 90                | 0.2445 | 0.3048 | 90                | 0.2037 | 0.3666 |
| 120               | 0.3623 | 0.2351 | 120               | 0.2836 | 0.3605 | 120               | 0.2314 | 0.4388 |
| 150               | 0.4018 | 0.2378 | 150               | 0.3229 | 0.406  | 150               | 0.2391 | 0.4748 |
| 180               | 0.4421 | 0.2302 | 180               | 0.3686 | 0.4608 | 180               | 0.2441 | 0.4958 |

**Table S8.** CIE coordinates of **1** with different press strains of 0, 10, 20, 30 and 40%.

| Strain (%) | x      | y      |
|------------|--------|--------|
| 0          | 0.2734 | 0.2154 |
| 10         | 0.2619 | 0.2064 |
| 20         | 0.2483 | 0.1964 |
| 30         | 0.2359 | 0.1904 |
| 40         | 0.2212 | 0.1869 |

**Table S9.** Summary of input and output information during the training of BPNN1 for classifying bending angle ( $\theta_1$ ).

| Input (R/B value) | Output data (bending angle) |     |     |     |         |
|-------------------|-----------------------------|-----|-----|-----|---------|
|                   | 0°                          | 30° | 60° | 90° | Curl up |
| R/B               |                             |     |     |     |         |
| 0.19249           | 1                           | 0   | 0   | 0   | 0       |
| 0.45532           | 0                           | 1   | 0   | 0   | 0       |
| 0.62551           | 0                           | 0   | 1   | 0   | 0       |
| 0.788             | 0                           | 0   | 0   | 1   | 0       |
| None              | 0                           | 0   | 0   | 0   | 1       |

In [Table S9](#), all data is used to training the BPNN1. The R/B value as input information are inputted in the input column of the BPNN. Various “0” and “1” inputted into the output column of the BPNN, in which “0” represents the false test object, and “1” represents the correct test object. All data is used to train the BPNN1.

**Table S10.** Network structure information of BPNN1.

| Network structure information |           |            |
|-------------------------------|-----------|------------|
| Input layer                   | 2 neurons | 1 Paranoid |
| Hidden layer 1                | 6 neurons | 1 Paranoid |

|                         |                       |
|-------------------------|-----------------------|
| Hidden layer 2          | 5 neurons             |
| Output layer            | FANN_NETTYPE_LAYER    |
| Network type            | FANN_TRAIN_RPROP      |
| Training function       | FANN_ERRORFUNC_LINEAR |
| Error function          | FANN_STOPFUNC_MSE     |
| Termination function    | FANN_SIGMOID_SYMMETRI |
|                         | C                     |
| Hidden layer excitation | FANN_SIGMOID_SYMMETRI |
| function                | C                     |
| Output layer excitation | FANN_NETTYPE_LAYER    |
| function                |                       |

| Network weight value |             |                  |                 |                  |
|----------------------|-------------|------------------|-----------------|------------------|
| Arrangement          | Wire number | Output point (n) | Input point (m) | Weight value (W) |
| 1                    | 0           | 0                | 2               | 0.589033         |
|                      | 1           | 1                | 2               | -1432.92         |
|                      | 2           | 0                | 3               | 21.6051          |
|                      | 3           | 1                | 3               | 6.67888          |
|                      | 4           | 0                | 4               | 0.991614         |
|                      | 5           | 1                | 4               | -1432.92         |
|                      | 6           | 0                | 5               | 10.5879          |
|                      | 7           | 1                | 5               | 5.20038          |
|                      | 8           | 0                | 6               | 2.50251          |
|                      | 9           | 1                | 6               | 1.2668           |
|                      | 10          | 0                | 7               | 1.01827          |
|                      | 11          | 1                | 7               | -1432.92         |
|                      | 12          | 2                | 9               | 1500             |
|                      | 13          | 3                | 9               | 1500             |
|                      | 14          | 4                | 9               | 1500             |
|                      | 15          | 5                | 9               | 1500             |
|                      | 16          | 6                | 9               | 1500             |
|                      | 17          | 7                | 9               | 1500             |
|                      | 18          | 8                | 9               | 1500             |
|                      | 19          | 2                | 10              | 3.75024          |
|                      | 20          | 3                | 10              | -50.6034         |
|                      | 21          | 4                | 10              | 4.6981           |
|                      | 22          | 5                | 10              | 169.414          |
|                      | 23          | 6                | 10              | -124.586         |
|                      | 24          | 7                | 10              | 27.4439          |
|                      | 25          | 8                | 10              | -3.58068         |
| 2                    | 26          | 2                | 11              | 2.50342          |
|                      | 27          | 3                | 11              | -108.655         |
|                      | 28          | 4                | 11              | 6.24981          |
|                      | 29          | 5                | 11              | 91.0153          |
|                      | 30          | 6                | 11              | 38.6634          |
|                      | 31          | 7                | 11              | 31.4101          |
|                      | 32          | 8                | 11              | -9.96034         |
|                      | 33          | 2                | 12              | 6.54752          |
|                      | 34          | 3                | 12              | 0.151122         |
|                      | 35          | 4                | 12              | 7.88862          |
|                      | 36          | 5                | 12              | -63.3146         |
|                      | 37          | 6                | 12              | 83.0465          |
|                      | 38          | 7                | 12              | 6.76897          |
|                      | 39          | 8                | 12              | -2.94446         |
|                      | 40          | 2                | 13              | 3.21999          |
|                      | 41          | 3                | 13              | 2.99298          |
|                      | 42          | 4                | 13              | 97.5685          |
|                      | 43          | 5                | 13              | -4.07579         |



|                                                           |             |                  |    |           |
|-----------------------------------------------------------|-------------|------------------|----|-----------|
|                                                           | 44          | 6                | 13 | -232.888  |
|                                                           | 45          | 7                | 13 | 9.16366   |
|                                                           | 46          | 8                | 13 | 17.4696   |
| Input / output column coefficients for manual calculation |             |                  |    |           |
| Listing                                                   | Minimum     | Maximum          |    |           |
| 0°                                                        | 0           | 1                |    |           |
| 30°                                                       | 0           | 1                |    |           |
| 60°                                                       | 0           | 1                |    |           |
| 90°                                                       | 0           | 1                |    |           |
| Curl up                                                   | 0           | 1                |    |           |
| Deviation statistics: mean variance                       |             |                  |    |           |
| Listing                                                   | All rows    | Calculation line |    | Test line |
| 0°                                                        | 0           | 0                |    | 0         |
| 30°                                                       | 0           | 0                |    | 0         |
| 60°                                                       | 0           | 0                |    | 0         |
| 90°                                                       | 5.18103e-07 | 5.18103e-07      |    | 0         |
| Curl up                                                   | 0           | 0                |    | 0         |

**Table S11.** The summary of mean square error (MSE), original value (OV), calculated value (CV), variance (Var.) for BPNN1.

| 1 | Input item | 0° (MSE = 0) |    |     | 30° (MSE = 0) |    |     | 60° (MSE = 0) |    |     | 90° (MSE = 5.18103e-07) |             | Curl up (MSE = 0) |    |    |     |
|---|------------|--------------|----|-----|---------------|----|-----|---------------|----|-----|-------------------------|-------------|-------------------|----|----|-----|
|   |            | OV           | CV | Var | OV            | CV | Var | OV            | CV | Var | OV                      | CV.         | Var.              | OV | CV | Var |
| 2 | R/B        | .            | .  | .   | .             | .  | .   | .             | .  | .   | .                       | .           | .                 | .  | .  | .   |
| 3 | 0.19249    | 1            | 1  | 0   | 0             | 0  | 0   | 0             | 0  | 0   | 0                       | 0.000118    | 1.3924e-08        | 0  | 0  | 0   |
| 4 | 0.45532    | 0            | 0  | 0   | 1             | 1  | 0   | 0             | 0  | 0   | 0                       | 0           | 0                 | 0  | 0  | 0   |
| 5 | 0.62551    | 0            | 0  | 0   | 0             | 0  | 0   | 1             | 1  | 0   | 0                       | 0.000542    | 2.93764e-07       | 0  | 0  | 0   |
| 6 | 0.788      | 0            | 0  | 0   | 0             | 0  | 0   | 0             | 0  | 1   | 0.998683                | 1.73449e-06 | 0                 | 0  | 0  | 0   |
| 7 | None       | 0            | 0  | 0   | 0             | 0  | 0   | 0             | 0  | 0   | 0                       | 0.0007405   | 5.4834e-07        | 1  | 1  | 0   |

In Table S11, all data is utilized to test the BPNN1. The R/B value as input information are inputted in the input column of the BPNN1. Through the BPNN1 calculation, various values (0-1) can be outputted, in which the values close to “0” represents the false test object, the values close to “1” represents the correct test object. By comparing the OV with CV, the variance can be obtained, which suggests that the BPNN1 has a good accuracy for classifying bending angle ( $\theta_1$ ).

**Table S12.** The matlab code of this BPNN 1.

| Matlab code                                                                                                                                                                                                                                                                                                                                                                                                        |
|--------------------------------------------------------------------------------------------------------------------------------------------------------------------------------------------------------------------------------------------------------------------------------------------------------------------------------------------------------------------------------------------------------------------|
| <pre>function [fO0, fO1, fO2, fO3, fO4] = MPredict(fI0)     fI0 = (fI0 - (0 + 5.4259368421052629) / 2.0) / (5.4259368421052629 - (0 + 5.4259368421052629) / 2.0);     fWei0 = 0.589033;     fWei1 = -1432.92;     fWei2 = 21.6051;     fWei3 = 6.67888;     fWei4 = 0.991614;     fWei5 = -1432.92;     fWei6 = 10.5879;     fWei7 = 5.20038;     fWei8 = 2.50251;     fWei9 = 1.2668;     fWei10 = 1.01827;</pre> |

---

```
fWei11 = -1432.92;
fWei12 = 1500;
fWei13 = 1500;
fWei14 = 1500;
fWei15 = 1500;
fWei16 = 1500;
fWei17 = 1500;
fWei18 = 1500;
fWei19 = 3.75024;
fWei20 = -50.6034;
fWei21 = 4.6981;
fWei22 = 169.414;
fWei23 = -124.586;
fWei24 = 27.4439;
fWei25 = -3.58068;
fWei26 = 2.50342;
fWei27 = -108.655;
fWei28 = 6.24981;
fWei29 = 91.0153;
fWei30 = 38.6634;
fWei31 = 31.4101;
fWei32 = -9.96034;
fWei33 = 6.54752;
fWei34 = 0.151122;
fWei35 = 7.88862;
fWei36 = -63.3146;
fWei37 = 83.0465;
fWei38 = 6.76897;
fWei39 = -2.94446;
fWei40 = 3.21999;
fWei41 = 2.99298;
fWei42 = 97.5685;
fWei43 = -4.07579;
fWei44 = -232.888;
fWei45 = 9.16366;
fWei46 = 17.4696;
f0 = f10;
f1 = 1.0;
f2 = 0.0;
f3 = 0.0;
f4 = 0.0;
f5 = 0.0;
f6 = 0.0;
f7 = 0.0;
f2 = f2 + f0 * fWei0;
f2 = f2 + f1 * fWei1;
f2 = f2 * 0.5;
f2 = (2.0 / (1.0 + exp(-2.0 * f2)) - 1.0);
f3 = f3 + f0 * fWei2;
f3 = f3 + f1 * fWei3;
f3 = f3 * 0.5;
f3 = (2.0 / (1.0 + exp(-2.0 * f3)) - 1.0);
f4 = f4 + f0 * fWei4;
f4 = f4 + f1 * fWei5;
f4 = f4 * 0.5;
f4 = (2.0 / (1.0 + exp(-2.0 * f4)) - 1.0);
f5 = f5 + f0 * fWei6;
```

---

---

```

f5 = f5 + f1 * fWei7;
f5 = f5 * 0.5;
f5 = (2.0 / (1.0 + exp(-2.0 * f5)) - 1.0);
f6 = f6 + f0 * fWei8;
f6 = f6 + f1 * fWei9;
f6 = f6 * 0.5;
f6 = (2.0 / (1.0 + exp(-2.0 * f6)) - 1.0);
f7 = f7 + f0 * fWei10;
f7 = f7 + f1 * fWei11;
f7 = f7 * 0.5;
f7 = (2.0 / (1.0 + exp(-2.0 * f7)) - 1.0);
f8 = 1.0;
f9 = 0.0;
f10 = 0.0;
f11 = 0.0;
f12 = 0.0;
f13 = 0.0;
f9 = f9 + f2 * fWei12;
f9 = f9 + f3 * fWei13;
f9 = f9 + f4 * fWei14;
f9 = f9 + f5 * fWei15;
f9 = f9 + f6 * fWei16;
f9 = f9 + f7 * fWei17;
f9 = f9 + f8 * fWei18;
f9 = f9 * 0.5;
f9 = (2.0 / (1.0 + exp(-2.0 * f9)) - 1.0);
f10 = f10 + f2 * fWei19;
f10 = f10 + f3 * fWei20;
f10 = f10 + f4 * fWei21;
f10 = f10 + f5 * fWei22;
f10 = f10 + f6 * fWei23;
f10 = f10 + f7 * fWei24;
f10 = f10 + f8 * fWei25;
f10 = f10 * 0.5;
f10 = (2.0 / (1.0 + exp(-2.0 * f10)) - 1.0);
f11 = f11 + f2 * fWei26;
f11 = f11 + f3 * fWei27;
f11 = f11 + f4 * fWei28;
f11 = f11 + f5 * fWei29;
f11 = f11 + f6 * fWei30;
f11 = f11 + f7 * fWei31;
f11 = f11 + f8 * fWei32;
f11 = f11 * 0.5;
f11 = (2.0 / (1.0 + exp(-2.0 * f11)) - 1.0);
f12 = f12 + f2 * fWei33;
f12 = f12 + f3 * fWei34;
f12 = f12 + f4 * fWei35;
f12 = f12 + f5 * fWei36;
f12 = f12 + f6 * fWei37;
f12 = f12 + f7 * fWei38;
f12 = f12 + f8 * fWei39;
f12 = f12 * 0.5;
f12 = (2.0 / (1.0 + exp(-2.0 * f12)) - 1.0);
f13 = f13 + f2 * fWei40;
f13 = f13 + f3 * fWei41;
f13 = f13 + f4 * fWei42;
f13 = f13 + f5 * fWei43;

```

---

```

f13 = f13 + f6 * fWei44;
f13 = f13 + f7 * fWei45;
f13 = f13 + f8 * fWei46;
f13 = f13 * 0.5;
f13 = (2.0 / (1.0 + exp(-2.0 * f13)) - 1.0);
f00 = f9;
f01 = f10;
f02 = f11;
f03 = f12;
f04 = f13;
f00 = f00 * (1 - (0 + 1) / 2.0) + (0 + 1) / 2.0;
f01 = f01 * (1 - (0 + 1) / 2.0) + (0 + 1) / 2.0;
f02 = f02 * (1 - (0 + 1) / 2.0) + (0 + 1) / 2.0;
f03 = f03 * (1 - (0 + 1) / 2.0) + (0 + 1) / 2.0;
f04 = f04 * (1 - (0 + 1) / 2.0) + (0 + 1) / 2.0;

```

**Table S13.** Summary of input and output information during the training of BPNN2.

| Input ( $\theta_1$ and $\theta_2$ ) |            | Output data ( $\theta_1$ - $\theta_2$ ) |                     |                      |                      |                  |
|-------------------------------------|------------|-----------------------------------------|---------------------|----------------------|----------------------|------------------|
| $\theta_1$                          | $\theta_2$ | $\theta_1$ -left45°                     | $\theta_1$ -left90° | $\theta_1$ -right45° | $\theta_1$ -right90° | $\theta_1$ -none |
| $\theta_1$                          | left45°    | 1                                       | 0                   | 0                    | 0                    | 0                |
| $\theta_1$                          | left90°    | 0                                       | 1                   | 0                    | 0                    | 0                |
| $\theta_1$                          | right45°   | 0                                       | 0                   | 1                    | 0                    | 0                |
| $\theta_1$                          | right90°   | 0                                       | 0                   | 0                    | 1                    | 0                |
| $\theta_1$                          | none       | 0                                       | 0                   | 0                    | 0                    | 1                |

In [Table S13](#), all data is used to training the BPNN2. The  $\theta_1$  and  $\theta_2$  values of finger as input information are inputted in the input column of the BPNN2. Various “0” and “1” inputted into the output column of the BPNN2, in which “0” represents the false angle, and “1” represents the correct angle. All data is used to train the BPNN2.

**Table S14.** Network structure information of BPNN2.

| Network structure information    |                        |            |
|----------------------------------|------------------------|------------|
| Input layer                      | 3 neurons              | 1 Paranoid |
| Hidden layer 1                   | 6 neurons              | 1 Paranoid |
| Hidden layer 2                   | 5 neurons              |            |
| Output layer                     | FANN_NETTYPE_LAYER     |            |
| Network type                     | FANN_TRAIN_RPROP       |            |
| Training function                | FANN_ERRORFUNC_LINEAR  |            |
| Error function                   | FANN_STOPFUNC_MSE      |            |
| Termination function             | FANN_SIGMOID_SYMMETRIC |            |
| Hidden layer excitation function | FANN_SIGMOID_SYMMETRIC |            |

  

| Network weight value |             |             |             |             |
|----------------------|-------------|-------------|-------------|-------------|
| Arrangement          | Arrangement | Arrangement | Arrangement | Arrangement |
|                      | 0           | 0           | 3           | 0.403499    |
|                      | 1           | 1           | 3           | 1.75701     |
|                      | 2           | 2           | 3           | 0.414392    |
|                      | 3           | 0           | 4           | 670.918     |
| 1                    | 4           | 1           | 4           | -1149.08    |
|                      | 5           | 2           | 4           | -454.169    |
|                      | 6           | 0           | 5           | 2.13783     |
|                      | 7           | 1           | 5           | -4.81258    |
|                      | 8           | 2           | 5           | -0.227264   |

|   |    |   |    |           |
|---|----|---|----|-----------|
|   | 9  | 0 | 6  | 2.00292   |
|   | 10 | 1 | 6  | 0.13086   |
|   | 11 | 2 | 6  | 0.0903639 |
|   | 12 | 0 | 7  | 1499.25   |
|   | 13 | 1 | 7  | -2.33014  |
|   | 14 | 2 | 7  | -1498.15  |
|   | 15 | 0 | 8  | 0.401937  |
|   | 16 | 1 | 8  | 9.21087   |
|   | 17 | 2 | 8  | 0.780127  |
|   | 18 | 3 | 10 | 302.478   |
|   | 19 | 4 | 10 | 941.381   |
|   | 20 | 5 | 10 | 1500      |
|   | 21 | 6 | 10 | 302.57    |
|   | 22 | 7 | 10 | 736.368   |
|   | 23 | 8 | 10 | 733.574   |
|   | 24 | 9 | 10 | 1500      |
|   | 25 | 3 | 11 | 3.56259   |
|   | 26 | 4 | 11 | 6.43238   |
|   | 27 | 5 | 11 | -20.9773  |
|   | 28 | 6 | 11 | 5.3754    |
|   | 29 | 7 | 11 | 9.65955   |
|   | 30 | 8 | 11 | -37.0324  |
|   | 31 | 9 | 11 | -5.95667  |
|   | 32 | 3 | 12 | -10.4143  |
|   | 33 | 4 | 12 | 12.8387   |
|   | 34 | 5 | 12 | -55.511   |
| 2 | 35 | 6 | 12 | 1.73649   |
|   | 36 | 7 | 12 | 12.9916   |
|   | 37 | 8 | 12 | -25.4246  |
|   | 38 | 9 | 12 | -8.79665  |
|   | 39 | 3 | 13 | -50.8769  |
|   | 40 | 4 | 13 | 3.92762   |
|   | 41 | 5 | 13 | -1.21771  |
|   | 42 | 6 | 13 | 1.68703   |
|   | 43 | 7 | 13 | 4.33599   |
|   | 44 | 8 | 13 | 34.6841   |
|   | 45 | 9 | 13 | -0.447542 |
|   | 46 | 3 | 14 | 142.733   |
|   | 47 | 4 | 14 | 6.10909   |
|   | 48 | 5 | 14 | 2.47398   |
|   | 49 | 6 | 14 | 109.29    |
|   | 50 | 7 | 14 | 1.2797    |
|   | 51 | 8 | 14 | 19.4559   |
|   | 52 | 9 | 14 | -1.60489  |

Input / output column coefficients for manual calculation

| Listing | Listing | Listing | Listing | Listing |
|---------|---------|---------|---------|---------|
|         | 0       | 1       |         |         |
|         | 0.95    | 5.26316 |         |         |
|         | 0       | 1       |         |         |
|         | 0       | 1       |         |         |
|         | 0       | 1       |         |         |
|         | 0       | 1       |         |         |
|         | 0       | 1       |         |         |

Deviation statistics: mean variance

| Listing | Listing     | Listing     | Listing | Listing |
|---------|-------------|-------------|---------|---------|
|         | 2.35445e-07 | 2.35445e-07 | 0       |         |
|         | 1.10528e-07 | 1.10528e-07 | 0       |         |

|  |             |             |   |
|--|-------------|-------------|---|
|  | 3.34785e-09 | 3.34785e-09 | 0 |
|  | 3.30856e-07 | 3.30856e-07 | 0 |
|  | 0           | 0           | 0 |

**Table S15.** The summary of mean square error (MSE), original value (OV), calculated value (CV), variance (Var.) of BPNN2.

| 1 | Input item |         | θ1-left45 (MSE = 2.35445e-07) |          |             | θ1-left90 (MSE = 1.10528e-07) |           |             | θ1-right45 (MSE = 3.34785e-09) |          |             | θ1-right90 (MSE = 3.30856e-07) |           |             | θ1-none (MSE = 0) |     |      |
|---|------------|---------|-------------------------------|----------|-------------|-------------------------------|-----------|-------------|--------------------------------|----------|-------------|--------------------------------|-----------|-------------|-------------------|-----|------|
|   |            |         | OV.                           | CV.      | Var.        | OV.                           | CV.       | Var.        | OV.                            | CV.      | Var.        | O                              | CV.       | Var.        | O                 | CV. | Var. |
| 2 | θ1 and θ2  |         | OV.                           | CV.      | Var.        | OV.                           | CV.       | Var.        | OV.                            | CV.      | Var.        | O                              | CV.       | Var.        | O                 | CV. | Var. |
| 3 | θ1         | left45  | 1                             | 0.998915 | 1.17723e-06 | 0                             | 0.000316  | 9.9856e-08  | 0                              | 0        | 0           | 0                              | 4.85e-05  | 2.35225e-09 | 0                 | 0   | 0    |
| 4 | θ1         | left90  | 0                             | 0        | 0           | 1                             | 0.99938   | 3.844e-07   | 0                              | 6.1e-05  | 3.721e-09   | 0                              | 0         | 0           | 0                 | 0   | 0    |
| 5 | θ1         | right45 | 0                             | 0        | 0           | 0                             | 0.0002615 | 6.83823e-08 | 1                              | 0.999893 | 1.1449e-08  | 0                              | 0.000222  | 4.9284e-08  | 0                 | 0   | 0    |
| 6 | θ1         | right90 | 0                             | 0        | 0           | 0                             | 0         | 0           | 0                              | 3.95e-05 | 1.56025e-09 | 1                              | 0.999008  | 9.84064e-07 | 0                 | 0   | 0    |
| 7 | θ1         | none    | 0                             | 0        | 0           | 0                             | 0         | 0           | 0                              | 3e-06    | 9e-12       | 0                              | 0.0007865 | 6.18582e-07 | 1                 | 1   | 0    |
| 8 | θ1         | left45  | 1                             | 0.998915 | 1.17723e-06 | 0                             | 0.000316  | 9.9856e-08  | 0                              | 0        | 0           | 0                              | 4.85e-05  | 2.35225e-09 | 0                 | 0   | 0    |

In Table S15, all data is utilized to test the BPNN2. The θ1 and θ2 values of finger as input information are inputted in the input column of the BPNN2. Through the BPNN2 calculation, various values (0-1) can be outputted, in which the values close to “0” represents the false angle, the values close to “1” represents the correct angle. By comparing the OV with CV, the variance can be obtained, which suggests that the BPNN2 has a good accuracy for sensing and rotating angles.

**Table S16.** The matlab code of this BPNN2.

```

function [fO0, fO1, fO2, fO3, fO4] = MPredict(fI0, fI1)
fI0 = (fI0 - (0 + 1) / 2.0) / (1 - (0 + 1) / 2.0);
fI1 = (fI1 - (0.95 + 5.2631578947368425) / 2.0) / (5.2631578947368425 - (0.95 + 5.2631578947368425) / 2.0);
fWei0 = 0.403499;
fWei1 = 1.75701;
fWei2 = 0.414392;
fWei3 = 670.918;
fWei4 = -1149.08;
fWei5 = -454.169;
fWei6 = 2.13783;
fWei7 = -4.81258;
fWei8 = -0.227264;
fWei9 = 2.00292;
fWei10 = 0.13086;
fWei11 = 0.0903639;
fWei12 = 1499.25;
fWei13 = -2.33014;
fWei14 = -1498.15;
fWei15 = 0.401937;
fWei16 = 9.21087;
fWei17 = 0.780127;
fWei18 = 302.478;
fWei19 = 941.381;
fWei20 = 1500;
fWei21 = 302.57;

```

---

```

fWei22 = 736.368;
fWei23 = 733.574;
fWei24 = 1500;
fWei25 = 3.56259;
fWei26 = 6.43238;
fWei27 = -20.9773;
fWei28 = 5.3754;
fWei29 = 9.65955;
fWei30 = -37.0324;
fWei31 = -5.95667;
fWei32 = -10.4143;
fWei33 = 12.8387;
fWei34 = -55.511;
fWei35 = 1.73649;
fWei36 = 12.9916;
fWei37 = -25.4246;
fWei38 = -8.79665;
fWei39 = -50.8769;
fWei40 = 3.92762;
fWei41 = -1.21771;
fWei42 = 1.68703;
fWei43 = 4.33599;
fWei44 = 34.6841;
fWei45 = -0.447542;
fWei46 = 142.733;
fWei47 = 6.10909;
fWei48 = 2.47398;
fWei49 = 109.29;
fWei50 = 1.2797;
fWei51 = 19.4559;
fWei52 = -1.60489;
f0 = f10;
f1 = f11;
f2 = 1.0;
f3 = 0.0;
f4 = 0.0;
f5 = 0.0;
f6 = 0.0;
f7 = 0.0;
f8 = 0.0;
f3 = f3 + f0 * fWei0;
f3 = f3 + f1 * fWei1;
f3 = f3 + f2 * fWei2;
f3 = f3 * 0.5;
f3 = (2.0 / (1.0 + exp(-2.0 * f3)) - 1.0);
f4 = f4 + f0 * fWei3;
f4 = f4 + f1 * fWei4;
f4 = f4 + f2 * fWei5;
f4 = f4 * 0.5;
f4 = (2.0 / (1.0 + exp(-2.0 * f4)) - 1.0);
f5 = f5 + f0 * fWei6;
f5 = f5 + f1 * fWei7;
f5 = f5 + f2 * fWei8;
f5 = f5 * 0.5;
f5 = (2.0 / (1.0 + exp(-2.0 * f5)) - 1.0);
f6 = f6 + f0 * fWei9;
f6 = f6 + f1 * fWei10;

```

---

---

```

f6 = f6 + f2 * fWei11;
f6 = f6 * 0.5;
f6 = (2.0 / (1.0 + exp(-2.0 * f6)) - 1.0);
f7 = f7 + f0 * fWei12;
f7 = f7 + f1 * fWei13;
f7 = f7 + f2 * fWei14;
f7 = f7 * 0.5;
f7 = (2.0 / (1.0 + exp(-2.0 * f7)) - 1.0);
f8 = f8 + f0 * fWei15;
f8 = f8 + f1 * fWei16;
f8 = f8 + f2 * fWei17;
f8 = f8 * 0.5;
f8 = (2.0 / (1.0 + exp(-2.0 * f8)) - 1.0);
f9 = 1.0;
f10 = 0.0;
f11 = 0.0;
f12 = 0.0;
f13 = 0.0;
f14 = 0.0;
f10 = f10 + f3 * fWei18;
f10 = f10 + f4 * fWei19;
f10 = f10 + f5 * fWei20;
f10 = f10 + f6 * fWei21;
f10 = f10 + f7 * fWei22;
f10 = f10 + f8 * fWei23;
f10 = f10 + f9 * fWei24;
f10 = f10 * 0.5;
f10 = (2.0 / (1.0 + exp(-2.0 * f10)) - 1.0);
f11 = f11 + f3 * fWei25;
f11 = f11 + f4 * fWei26;
f11 = f11 + f5 * fWei27;
f11 = f11 + f6 * fWei28;
f11 = f11 + f7 * fWei29;
f11 = f11 + f8 * fWei30;
f11 = f11 + f9 * fWei31;
f11 = f11 * 0.5;
f11 = (2.0 / (1.0 + exp(-2.0 * f11)) - 1.0);
f12 = f12 + f3 * fWei32;
f12 = f12 + f4 * fWei33;
f12 = f12 + f5 * fWei34;
f12 = f12 + f6 * fWei35;
f12 = f12 + f7 * fWei36;
f12 = f12 + f8 * fWei37;
f12 = f12 + f9 * fWei38;
f12 = f12 * 0.5;
f12 = (2.0 / (1.0 + exp(-2.0 * f12)) - 1.0);
f13 = f13 + f3 * fWei39;
f13 = f13 + f4 * fWei40;
f13 = f13 + f5 * fWei41;
f13 = f13 + f6 * fWei42;
f13 = f13 + f7 * fWei43;
f13 = f13 + f8 * fWei44;
f13 = f13 + f9 * fWei45;
f13 = f13 * 0.5;
f13 = (2.0 / (1.0 + exp(-2.0 * f13)) - 1.0);
f14 = f14 + f3 * fWei46;
f14 = f14 + f4 * fWei47;

```

---





Table S19. Summary data of the 3-D fingerprint texture image after tactile enhancement.

Table with 48 columns and 48 rows of numerical data, representing summary data for a 3-D fingerprint texture image after tactile enhancement.

Table S20. Summary data of the 2-D fingerprint texture gray image after tactile enhancement.

Table with 48 columns and 48 rows of numerical data, representing summary data for a 2-D fingerprint texture gray image after tactile enhancement.

Table S21. Summary data of the 3-D palm texture image before tactile enhancement.

Table with 48 columns and 48 rows of numerical data, representing summary data for a 3-D palm texture image before tactile enhancement.

**Table S22.** Summary data of the initial 2-D palm texture gray image before tactile enhancement.

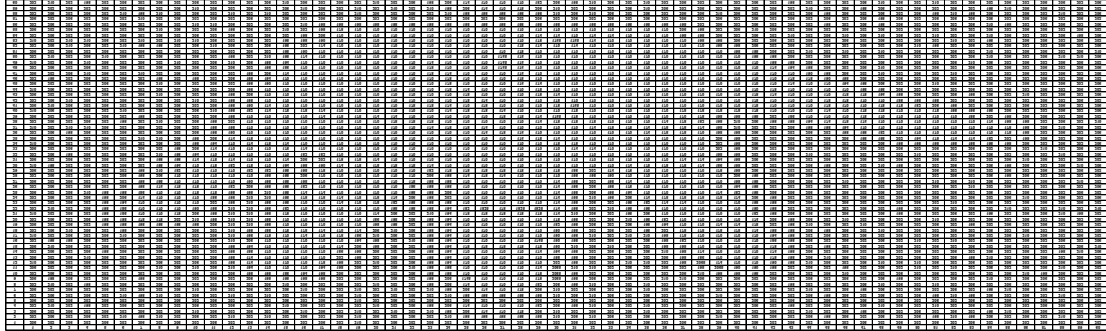

**Table S23.** Summary data of the 3-D palm texture image after tactile enhancement.

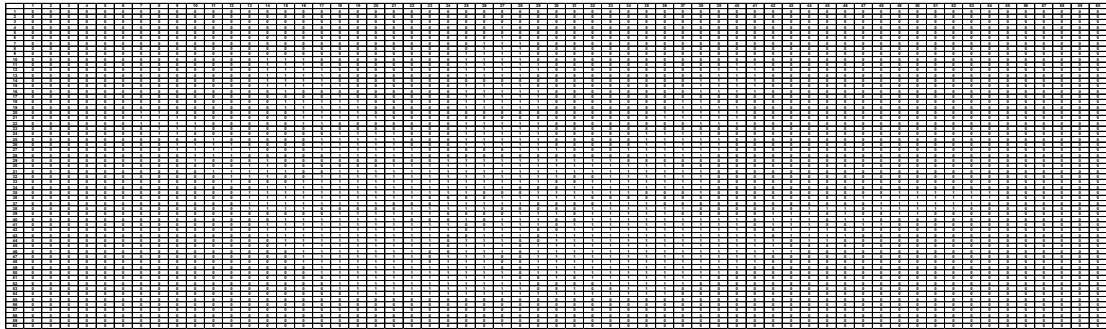

**Table S24.** Summary data of the 3-D palm texture gray image after tactile enhancement.

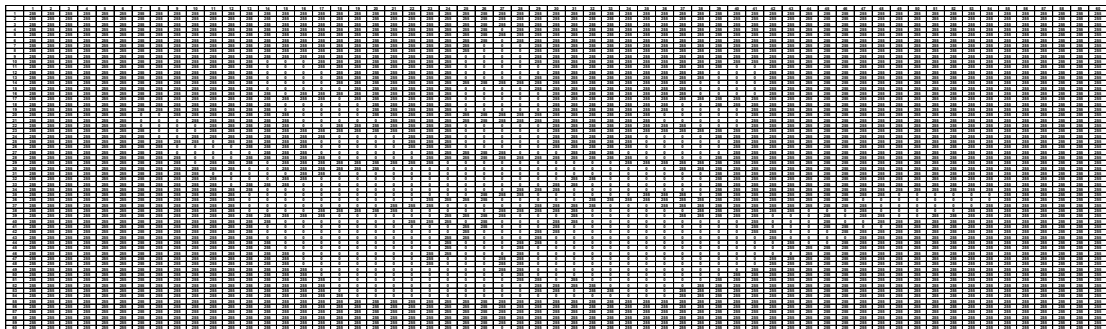

Supplement: d3mh00096f1.pdf [file d3mh00096f1.pdf]
